# Supplementary material
Source: publisher site journal article supplement (https://www.dovepress.com/article/336450)
Supplement: Supplementary file 1 [file get_supplementary_file.php]

**Supporting Information**

**Antibacterial, Docking, DFT and ADMET properties Evaluation of some hybrid Chalcone-Sulfonamide derivatives prepared using ZnO Nanoparticle Catalysis**

Abdanne Weyessa1, Rajalakshmanan Eswaramoorthy1*, Yadessa Melaku1* and Endale Mulugeta1*

1Department of Applied Chemistry, School of Applied Natural Science, Adama Science and Technology University, P.O.Box 1888, Adama, Ethiopia

*Email: [rajalakshmanan.e@gmail.com](mailto:rajalakshmanan.e@gmail.com), [yadessamelaku2010@gmail.com](mailto:yadessamelaku2010@gmail.com) and [endexindex05@gmail.com](mailto:endexindex05@gmail.com)


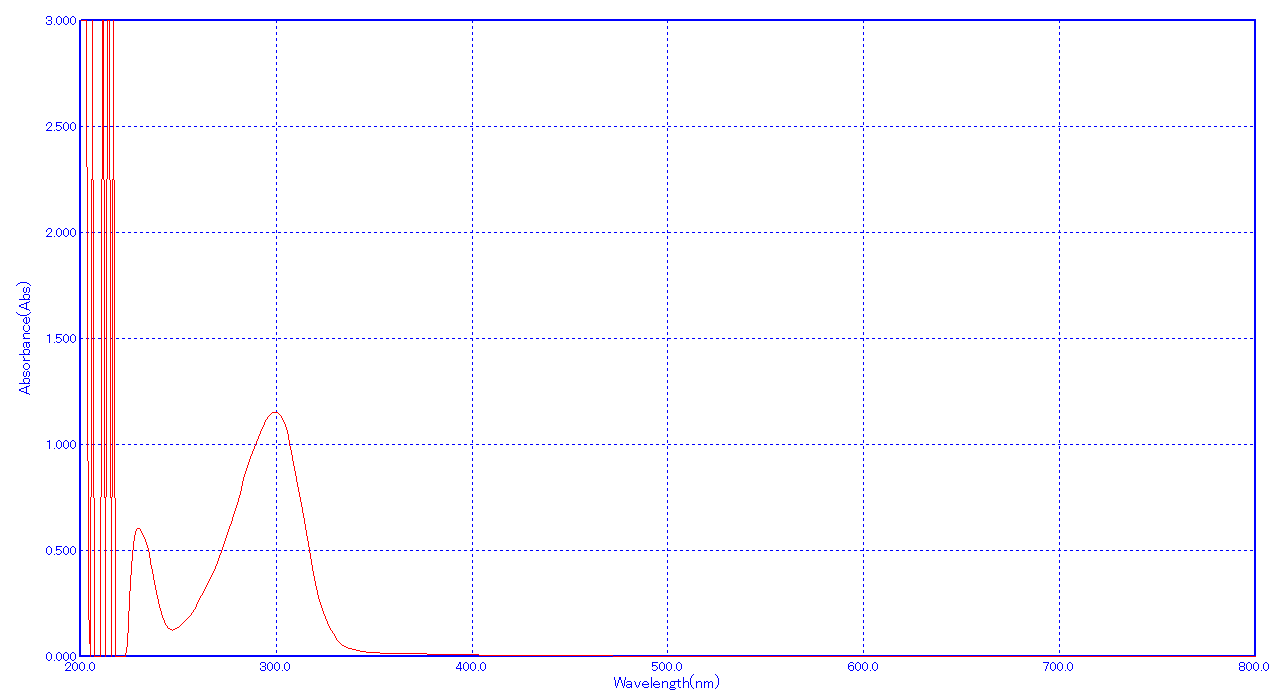


**Fig. S1:** UV-Vis of p-aminoacetophenone (**4**)


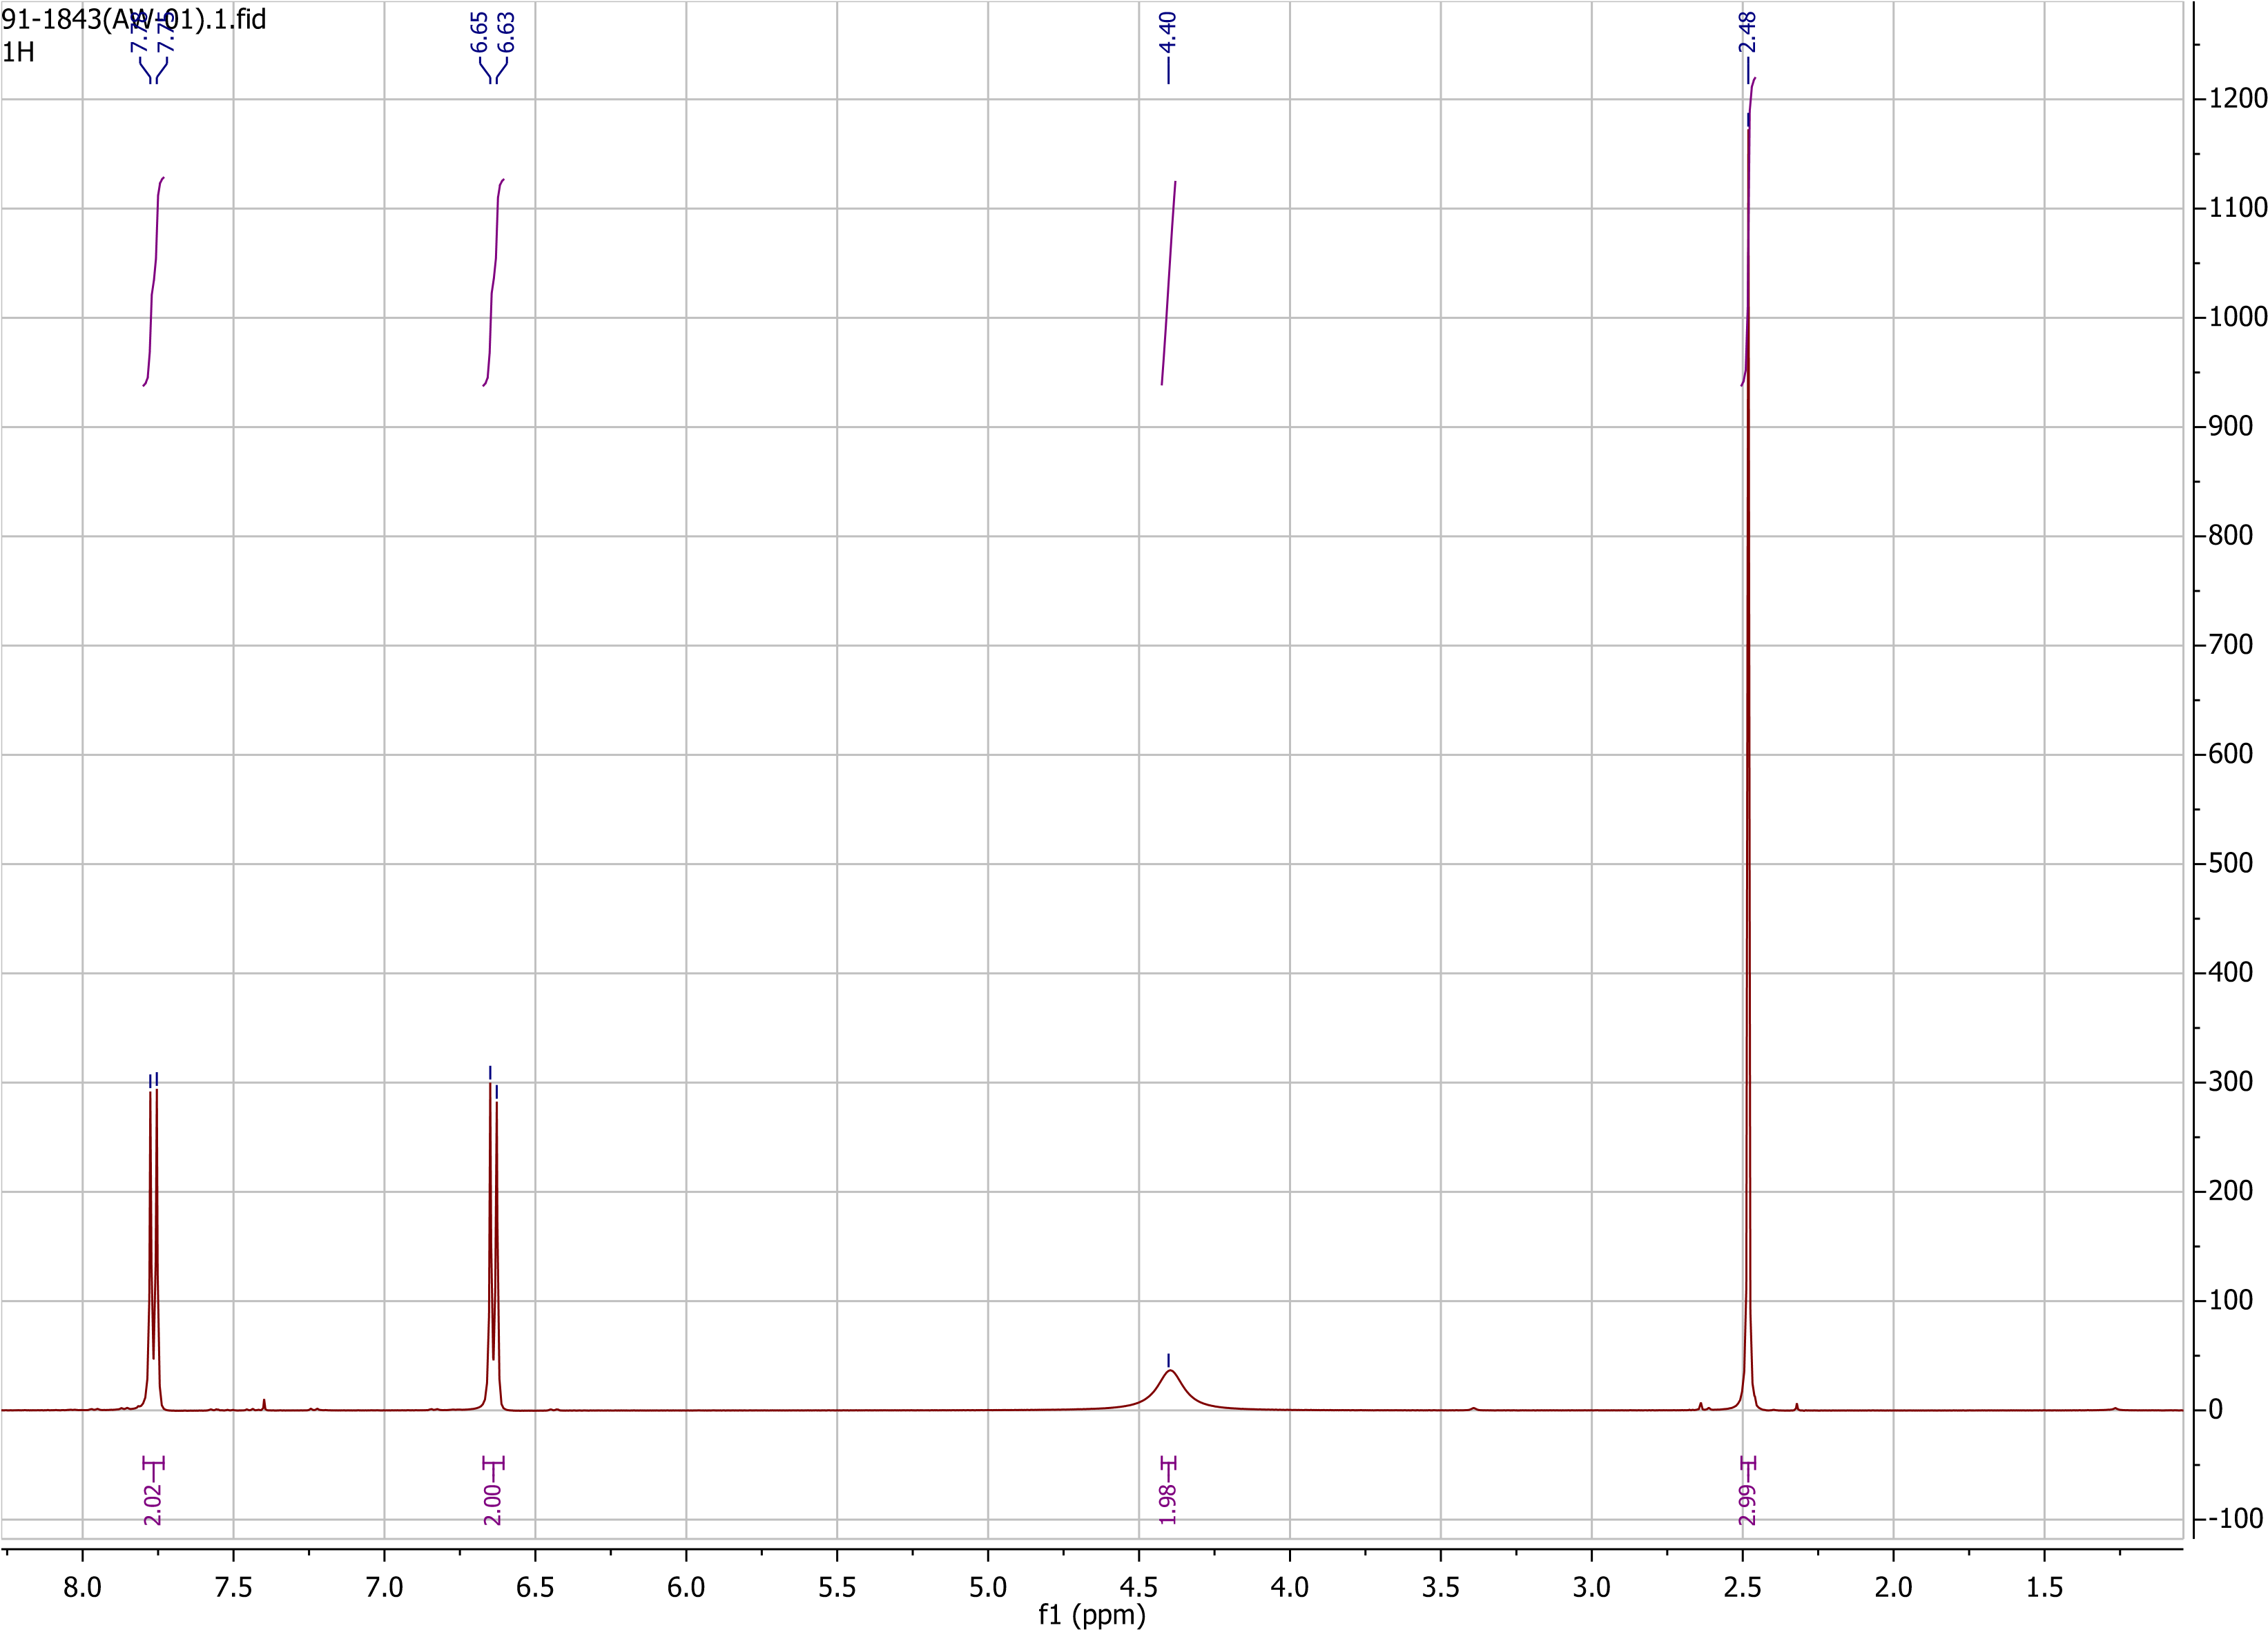


**Fig. S2:** 1H NMR of p-aminoacetophenone (**4**).


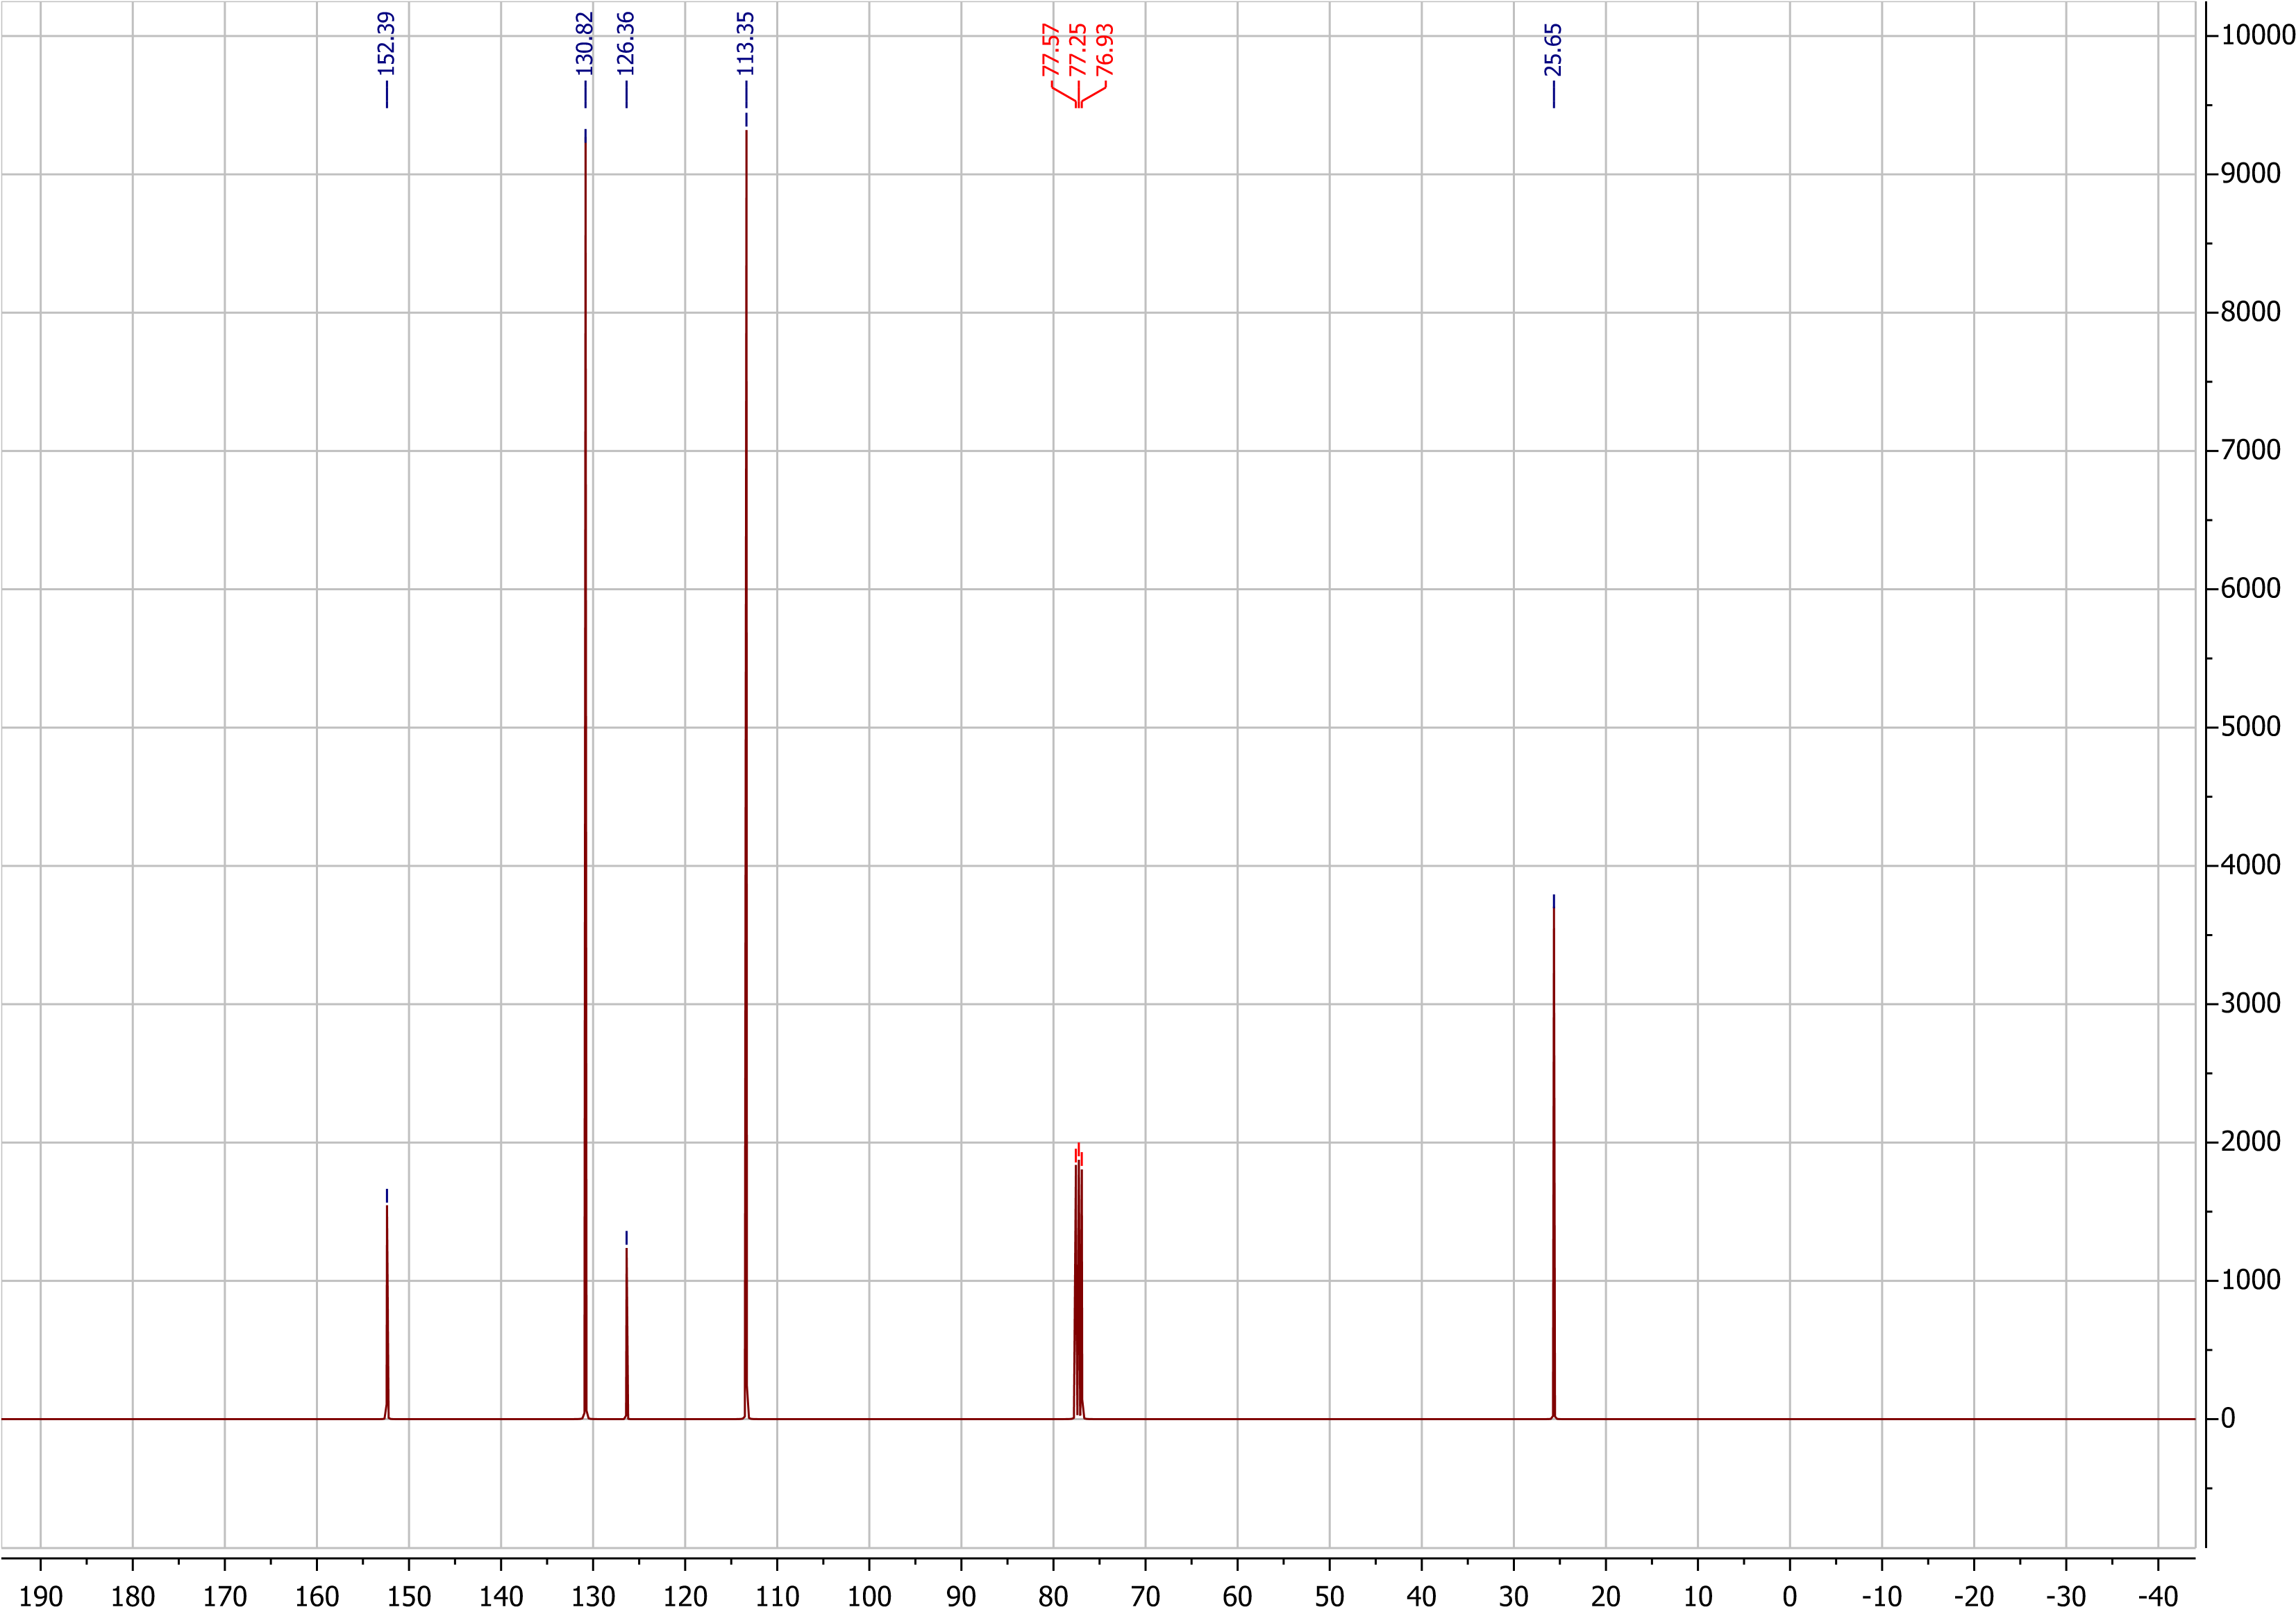


**Fig. S3:** 13C of p-aminoacetophenone (**4**).


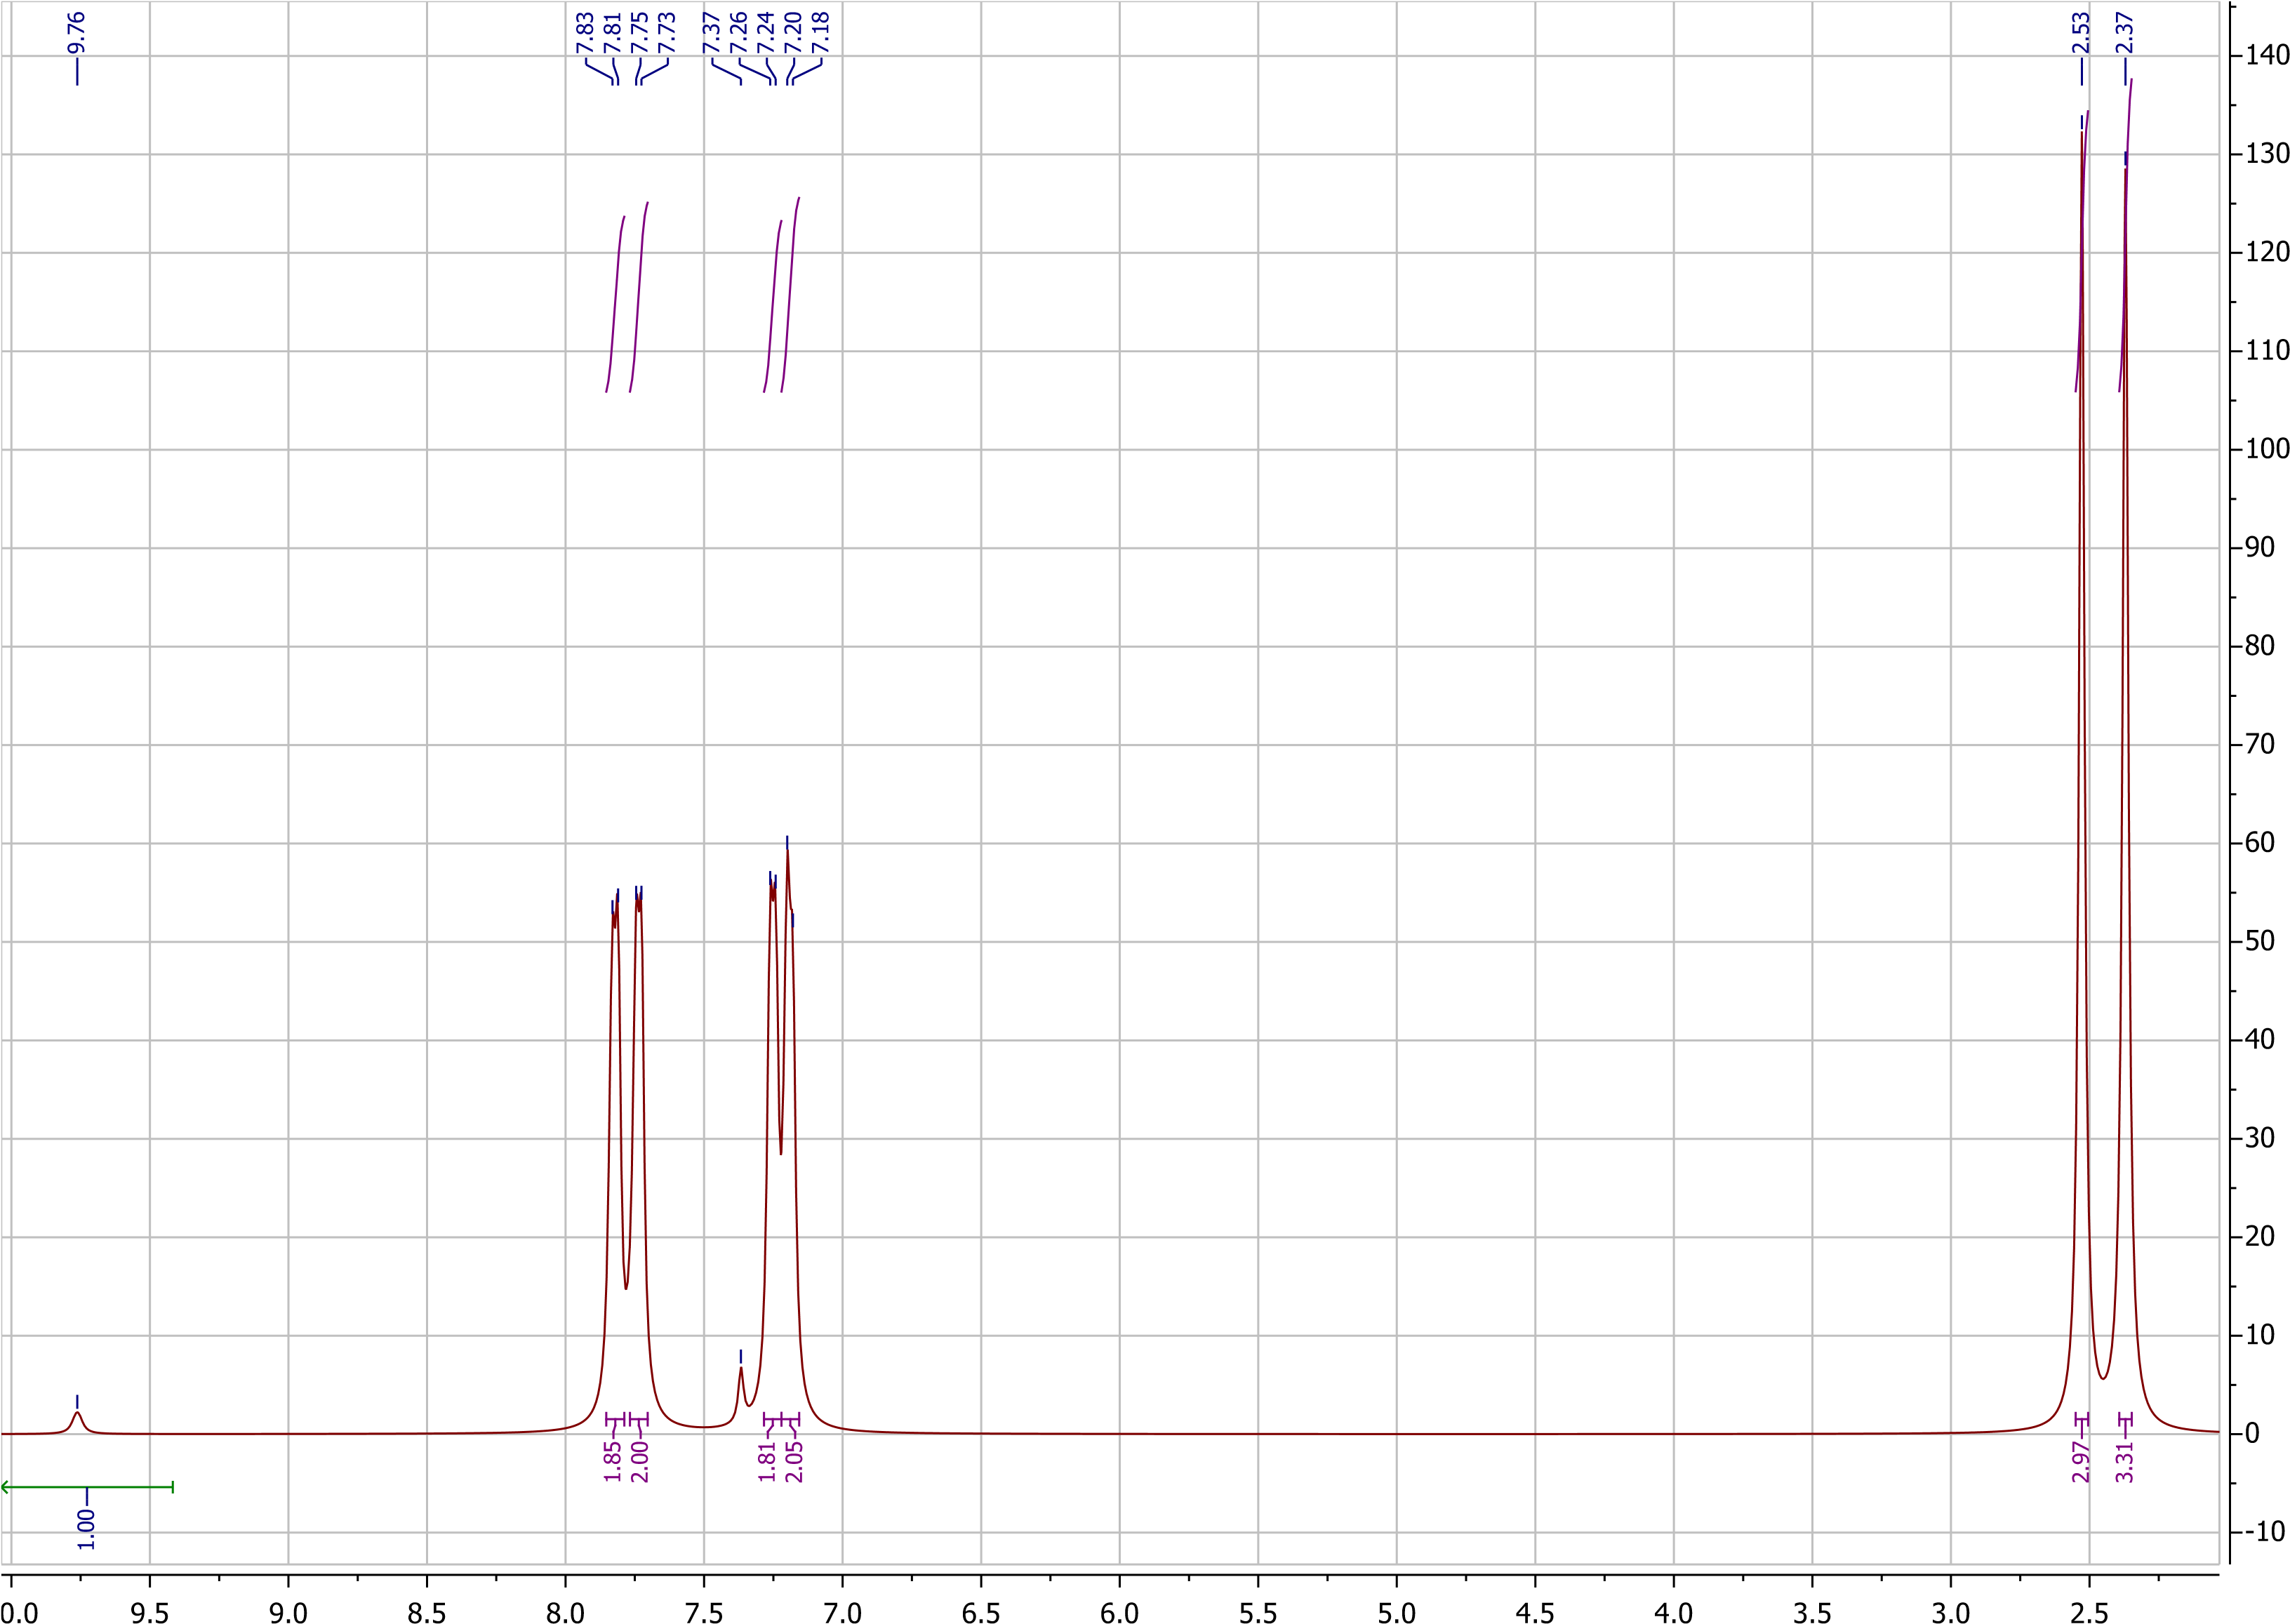


**Fig. S4:** 1H NMR of ketone sulfonamide (**5b**)


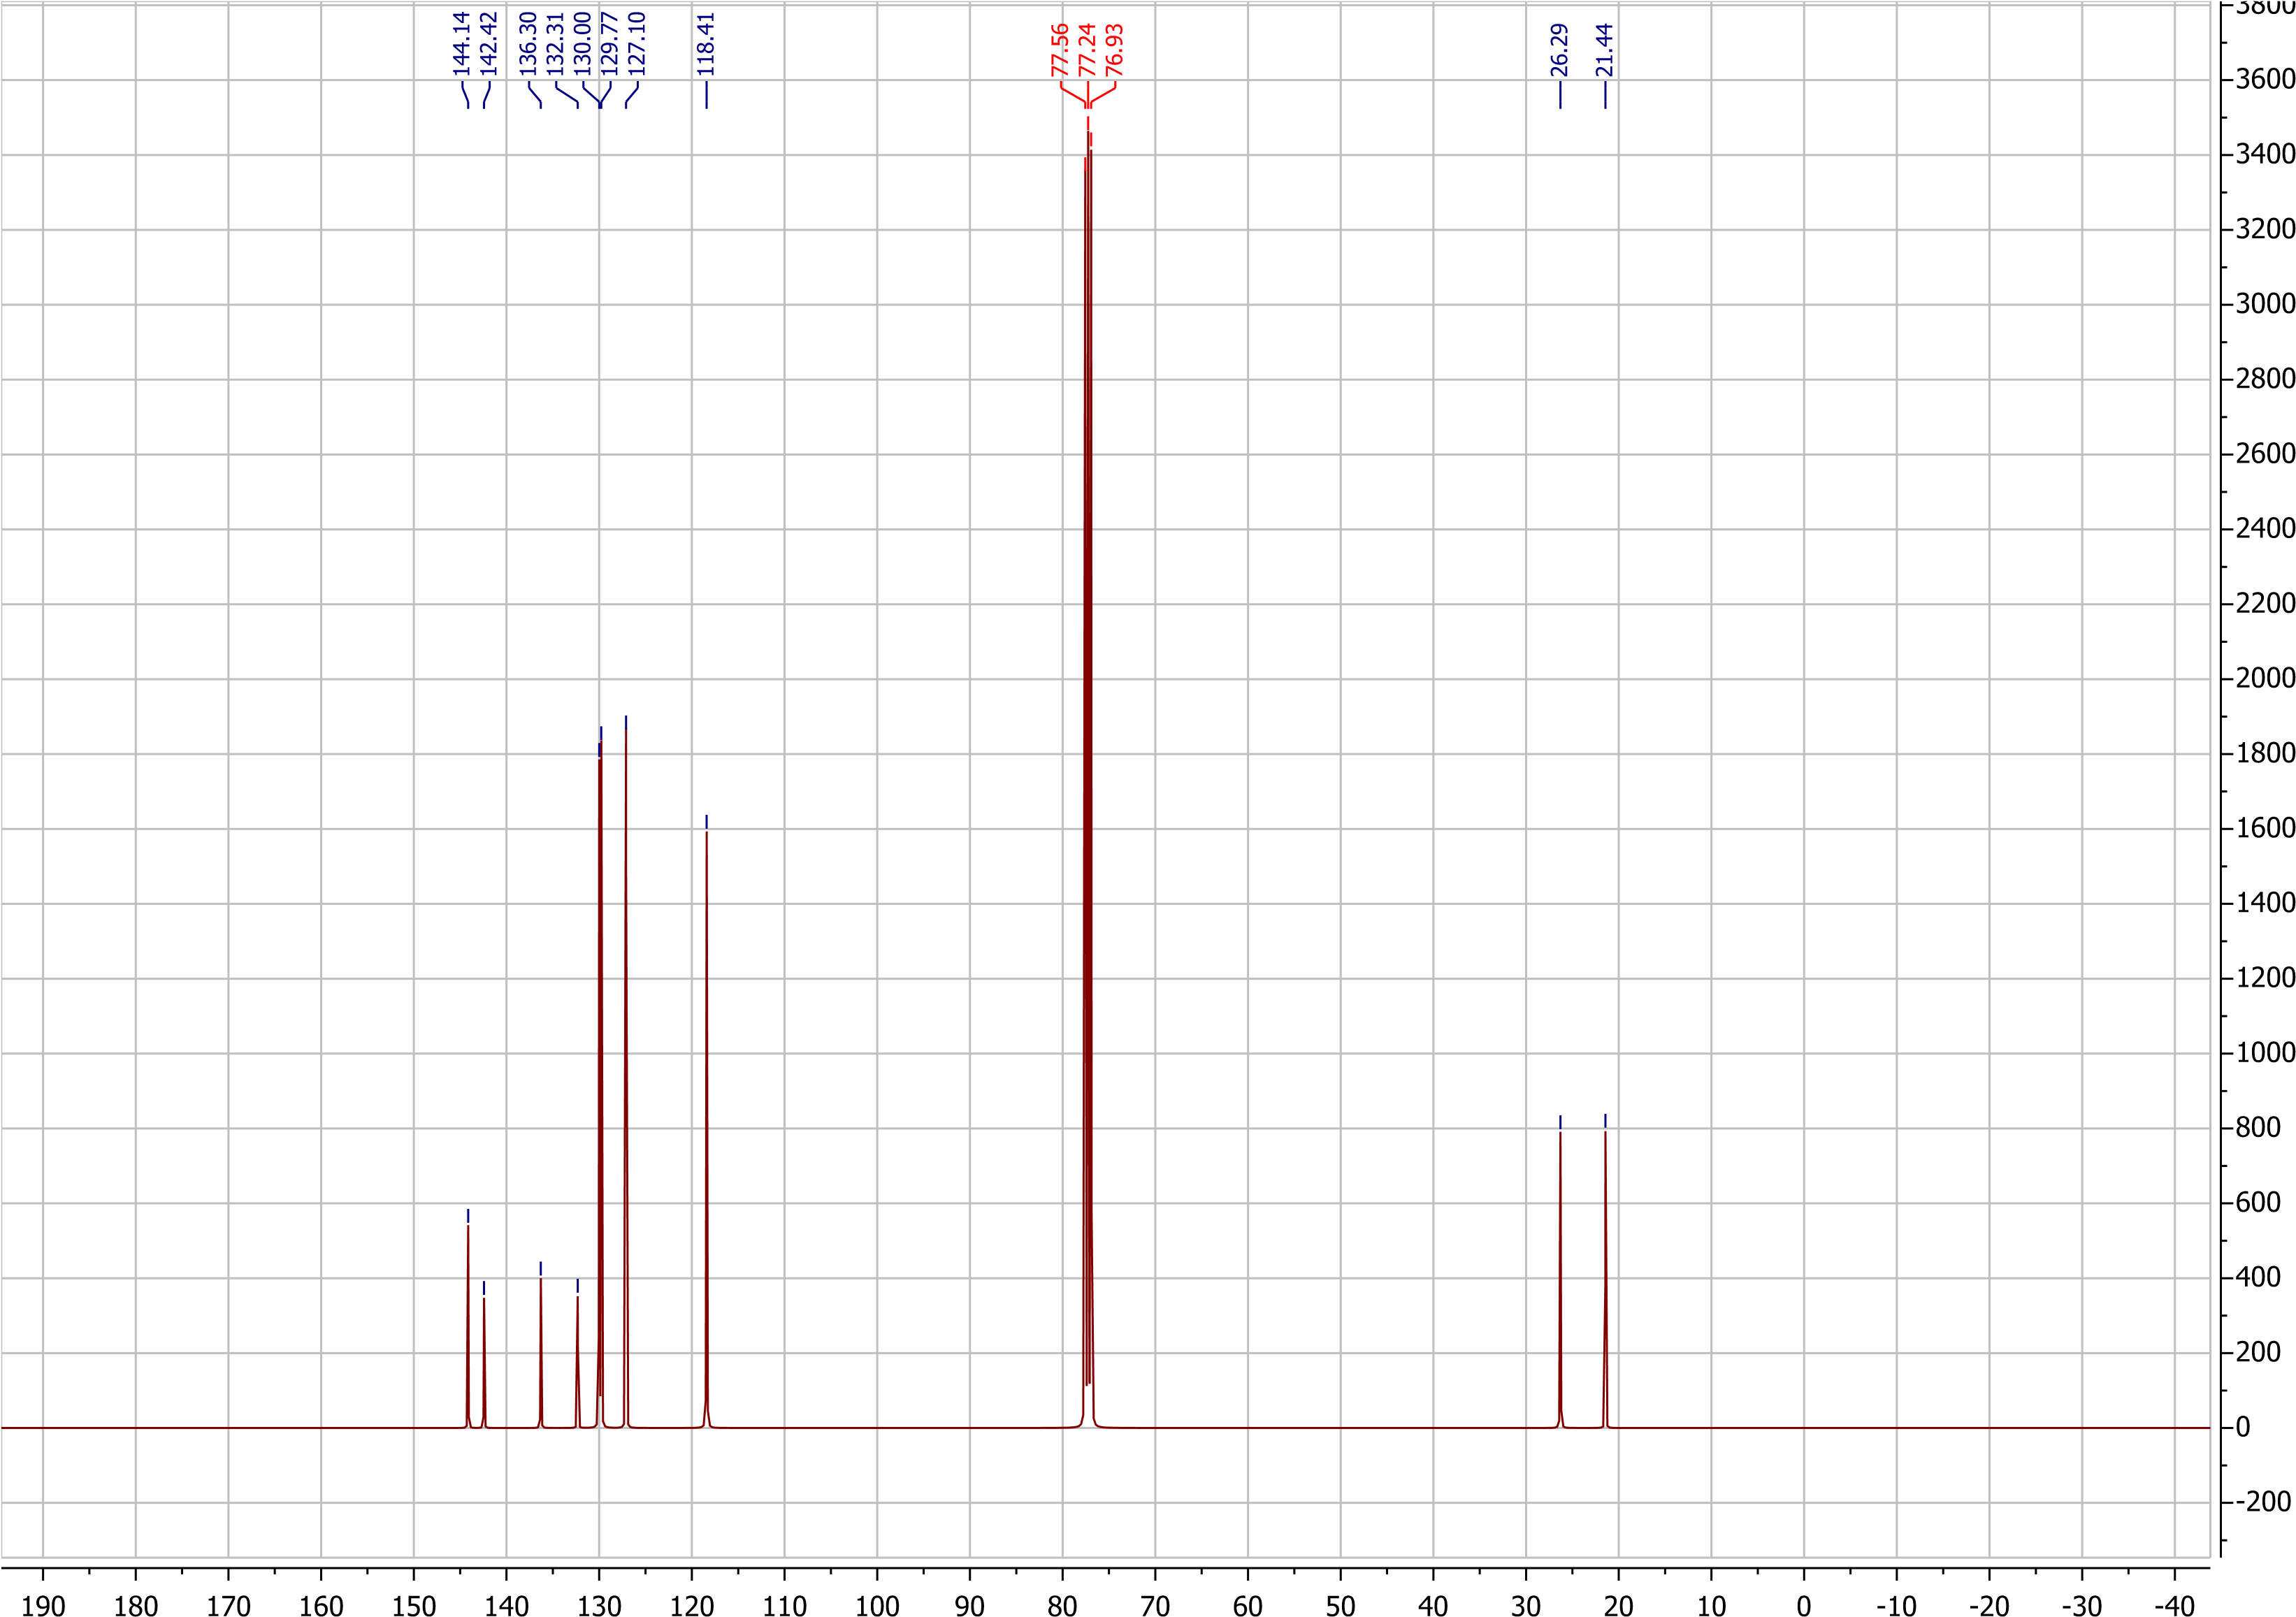


**Fig. S5:** 13C NMR of ketone sulfonamide (**5b**)


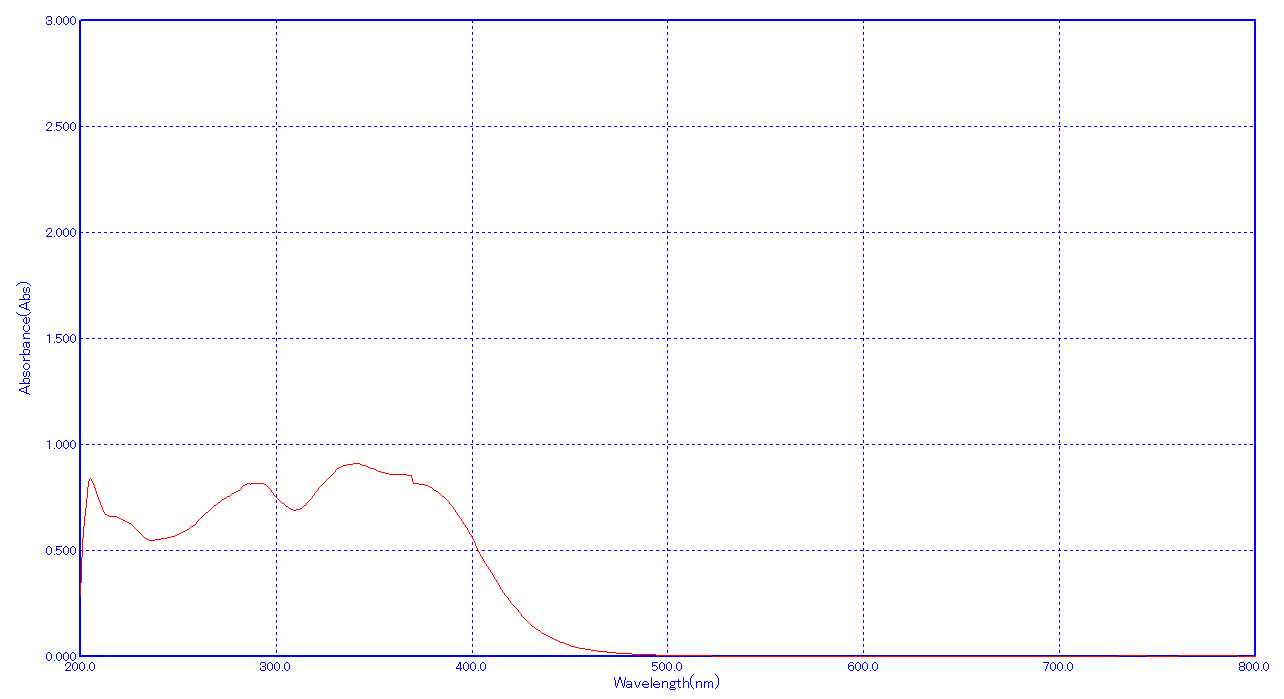


**Fig. S6:** UV-Vis of compound **6**


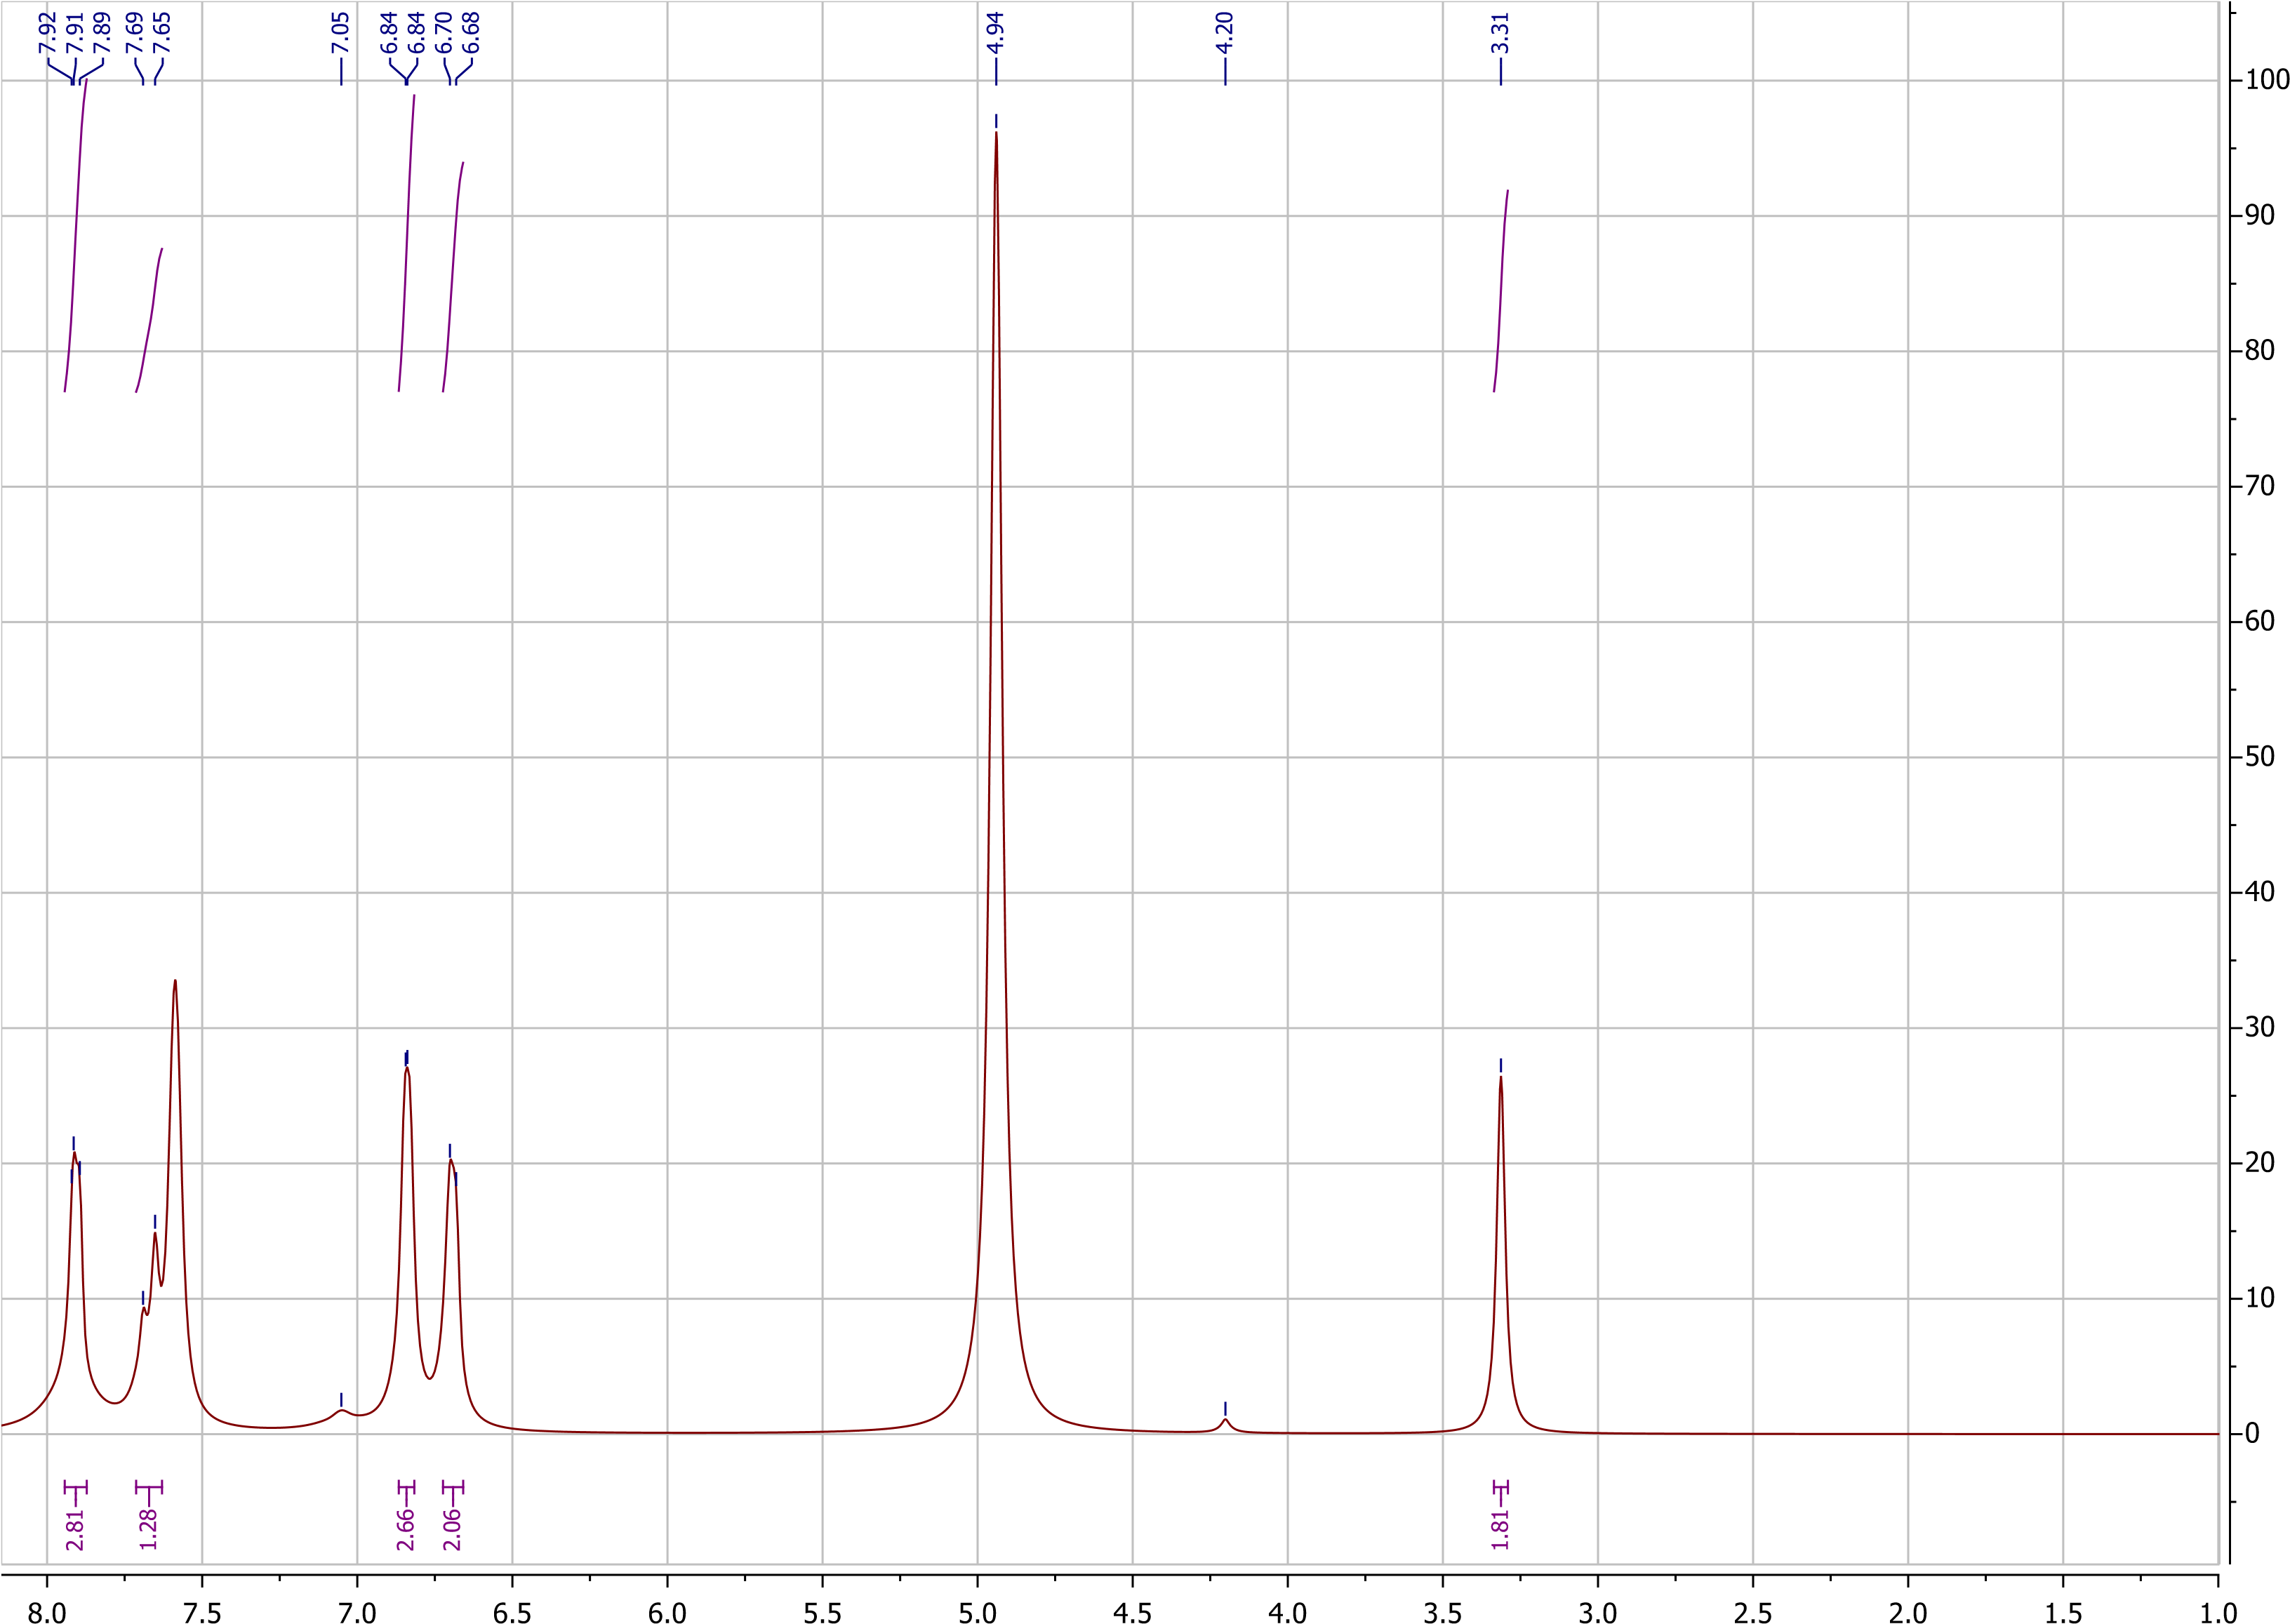


**Fig. S7:** 1H- NMR of compound **6.**


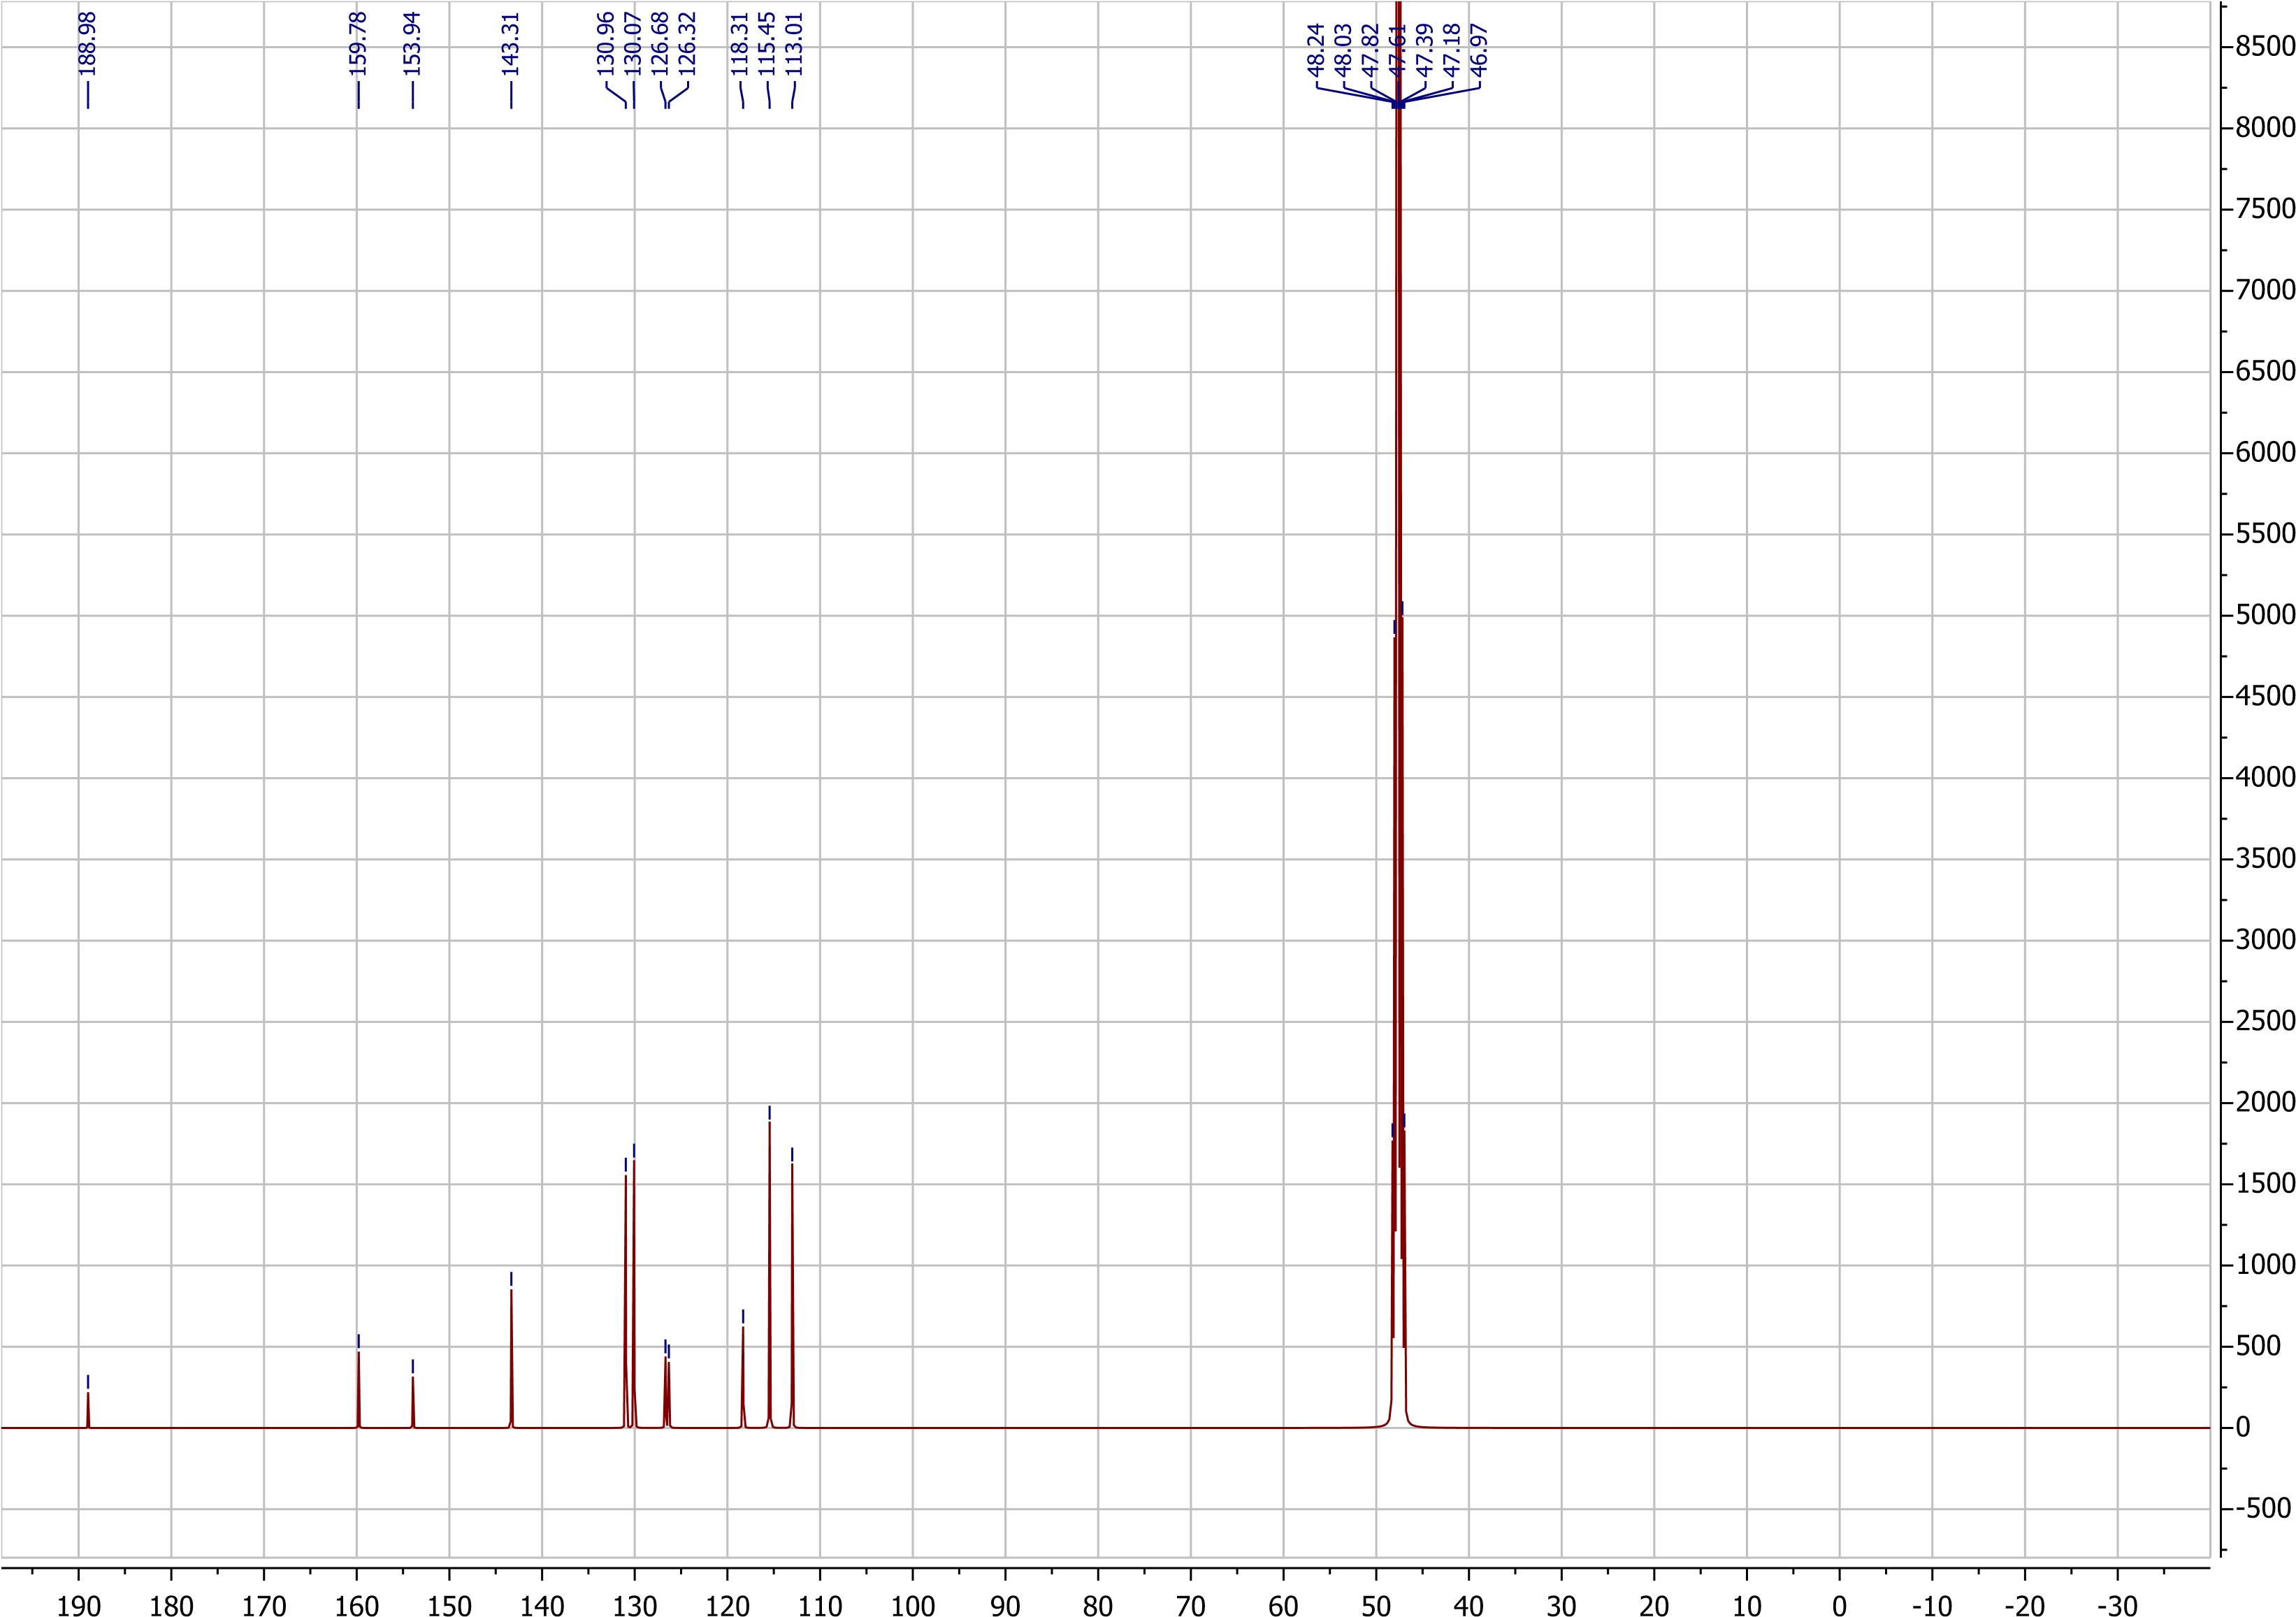


**Fig. S8:** 13C-NMR of compound **6.**


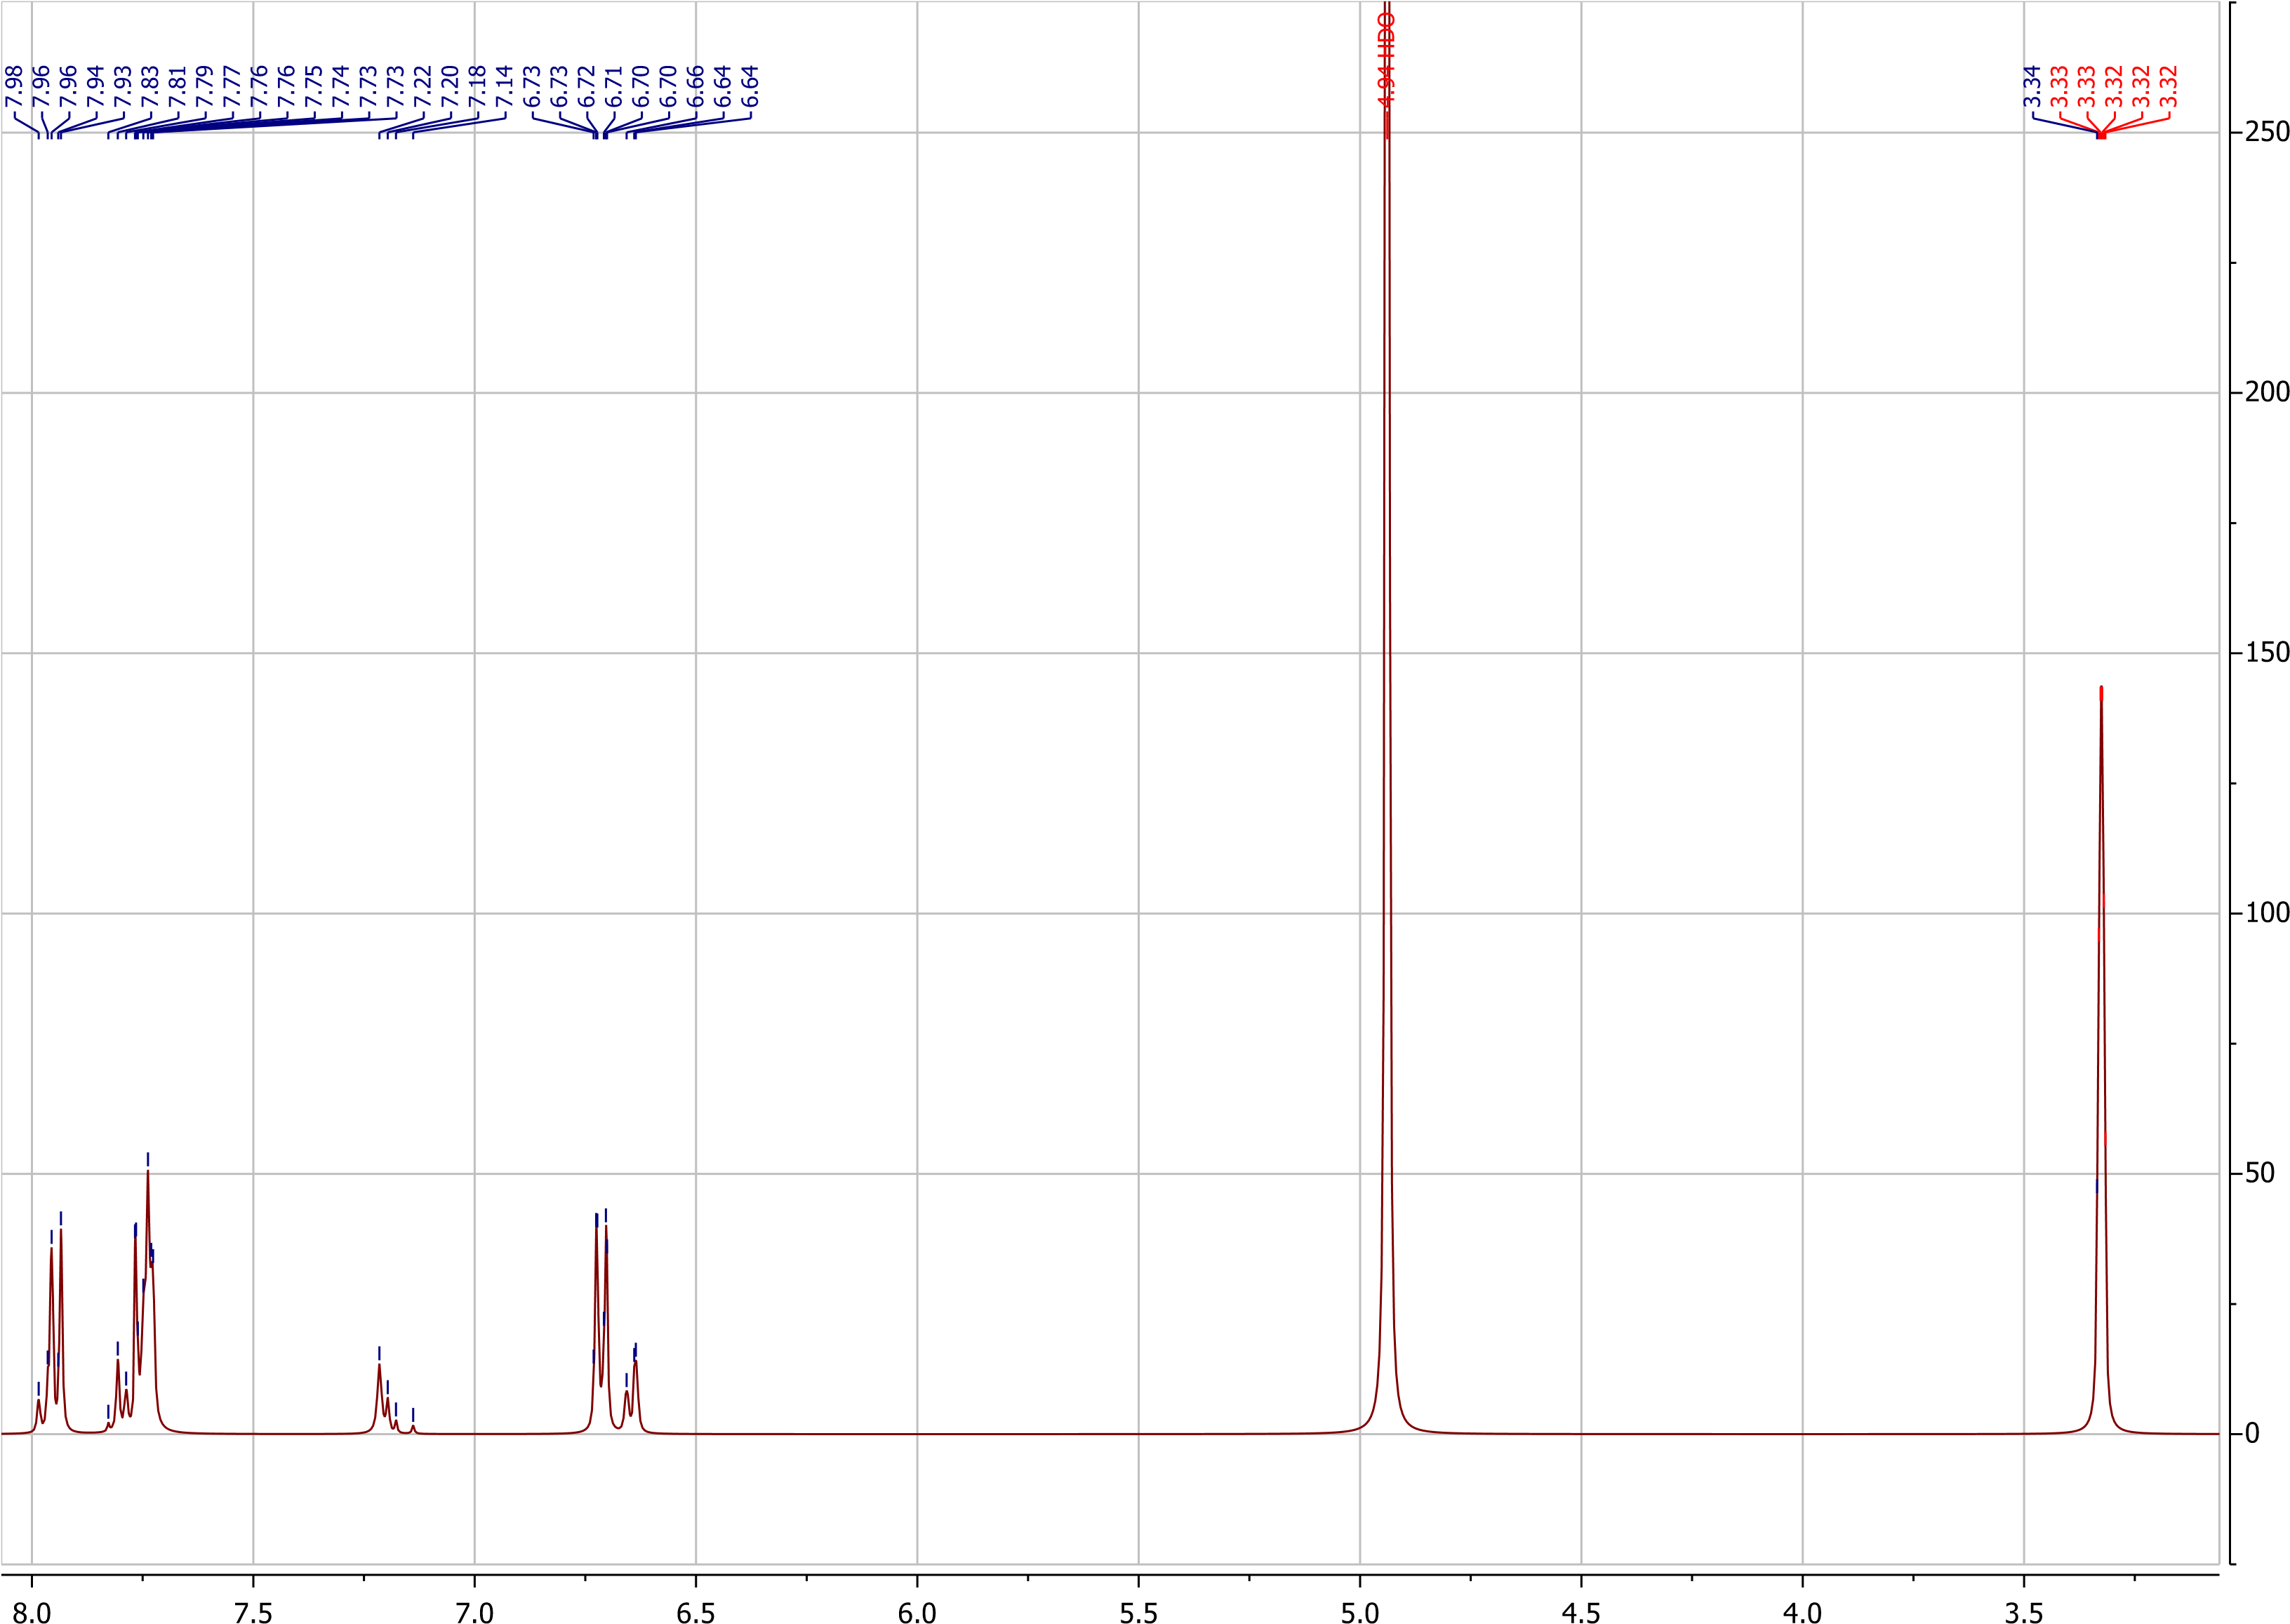


**Fig. S9:** 1H-NMR of compound **7.**


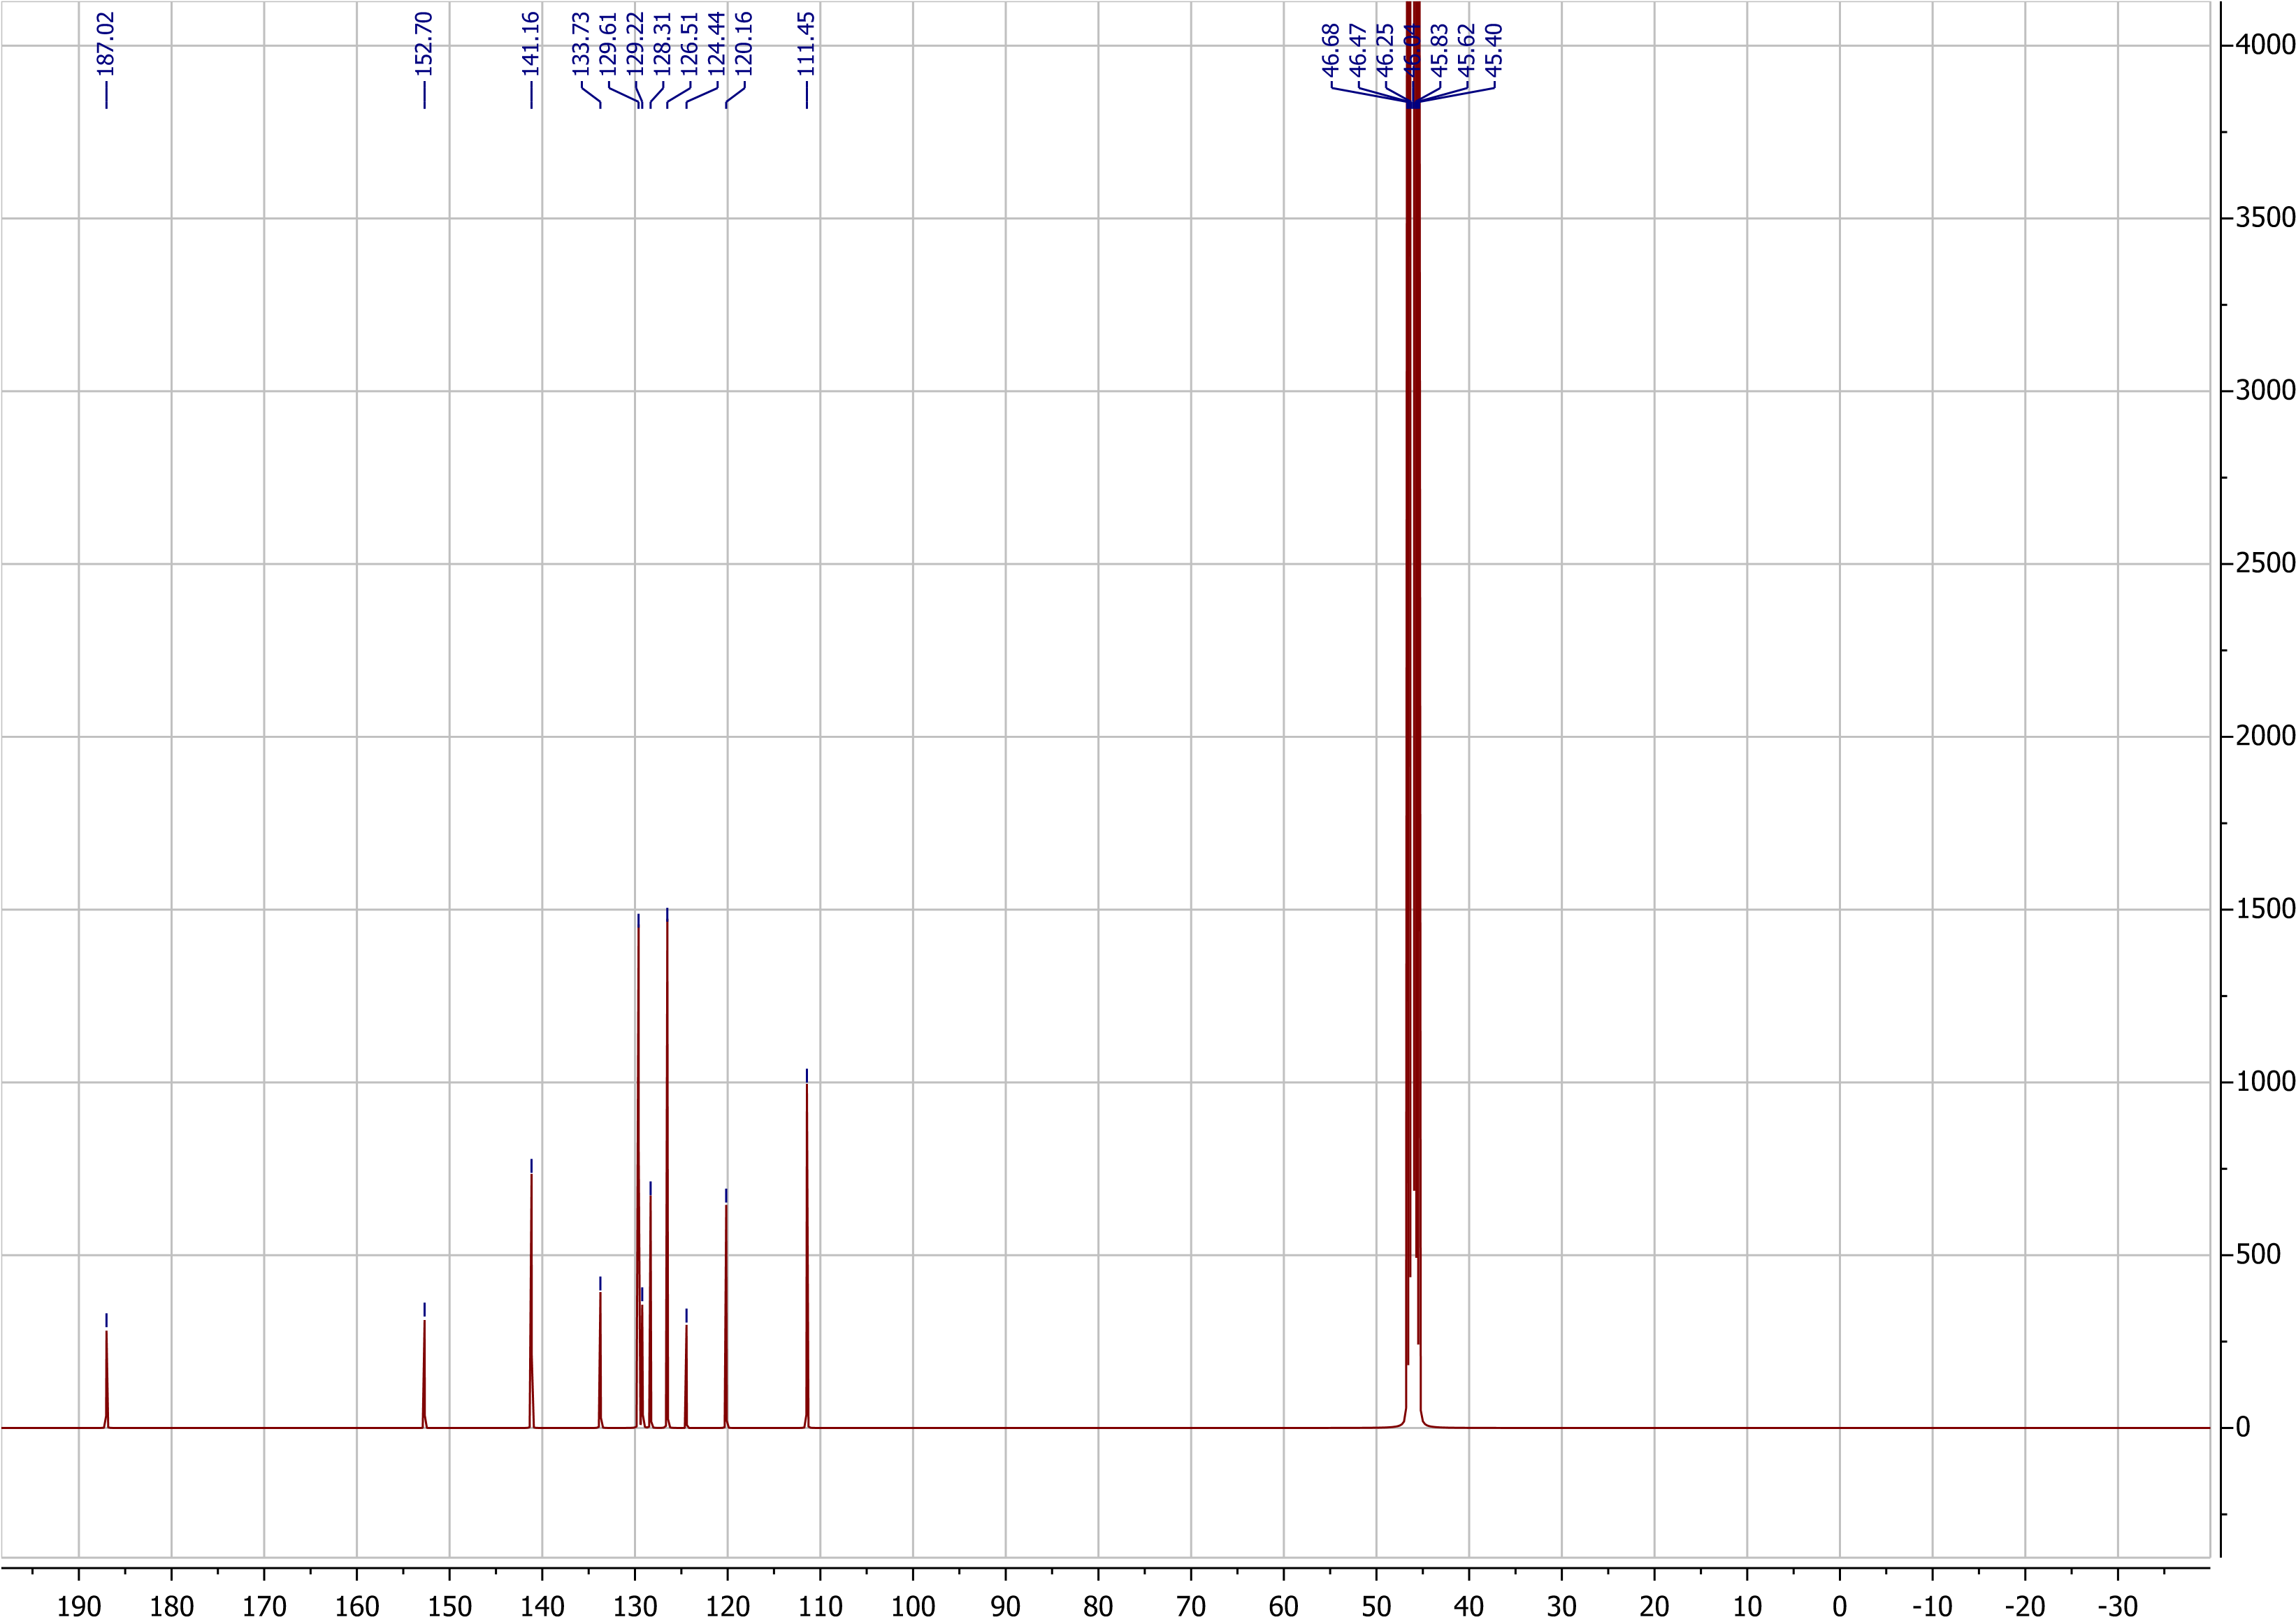


**Fig. S10:** 13C-NMR of compound **7**.


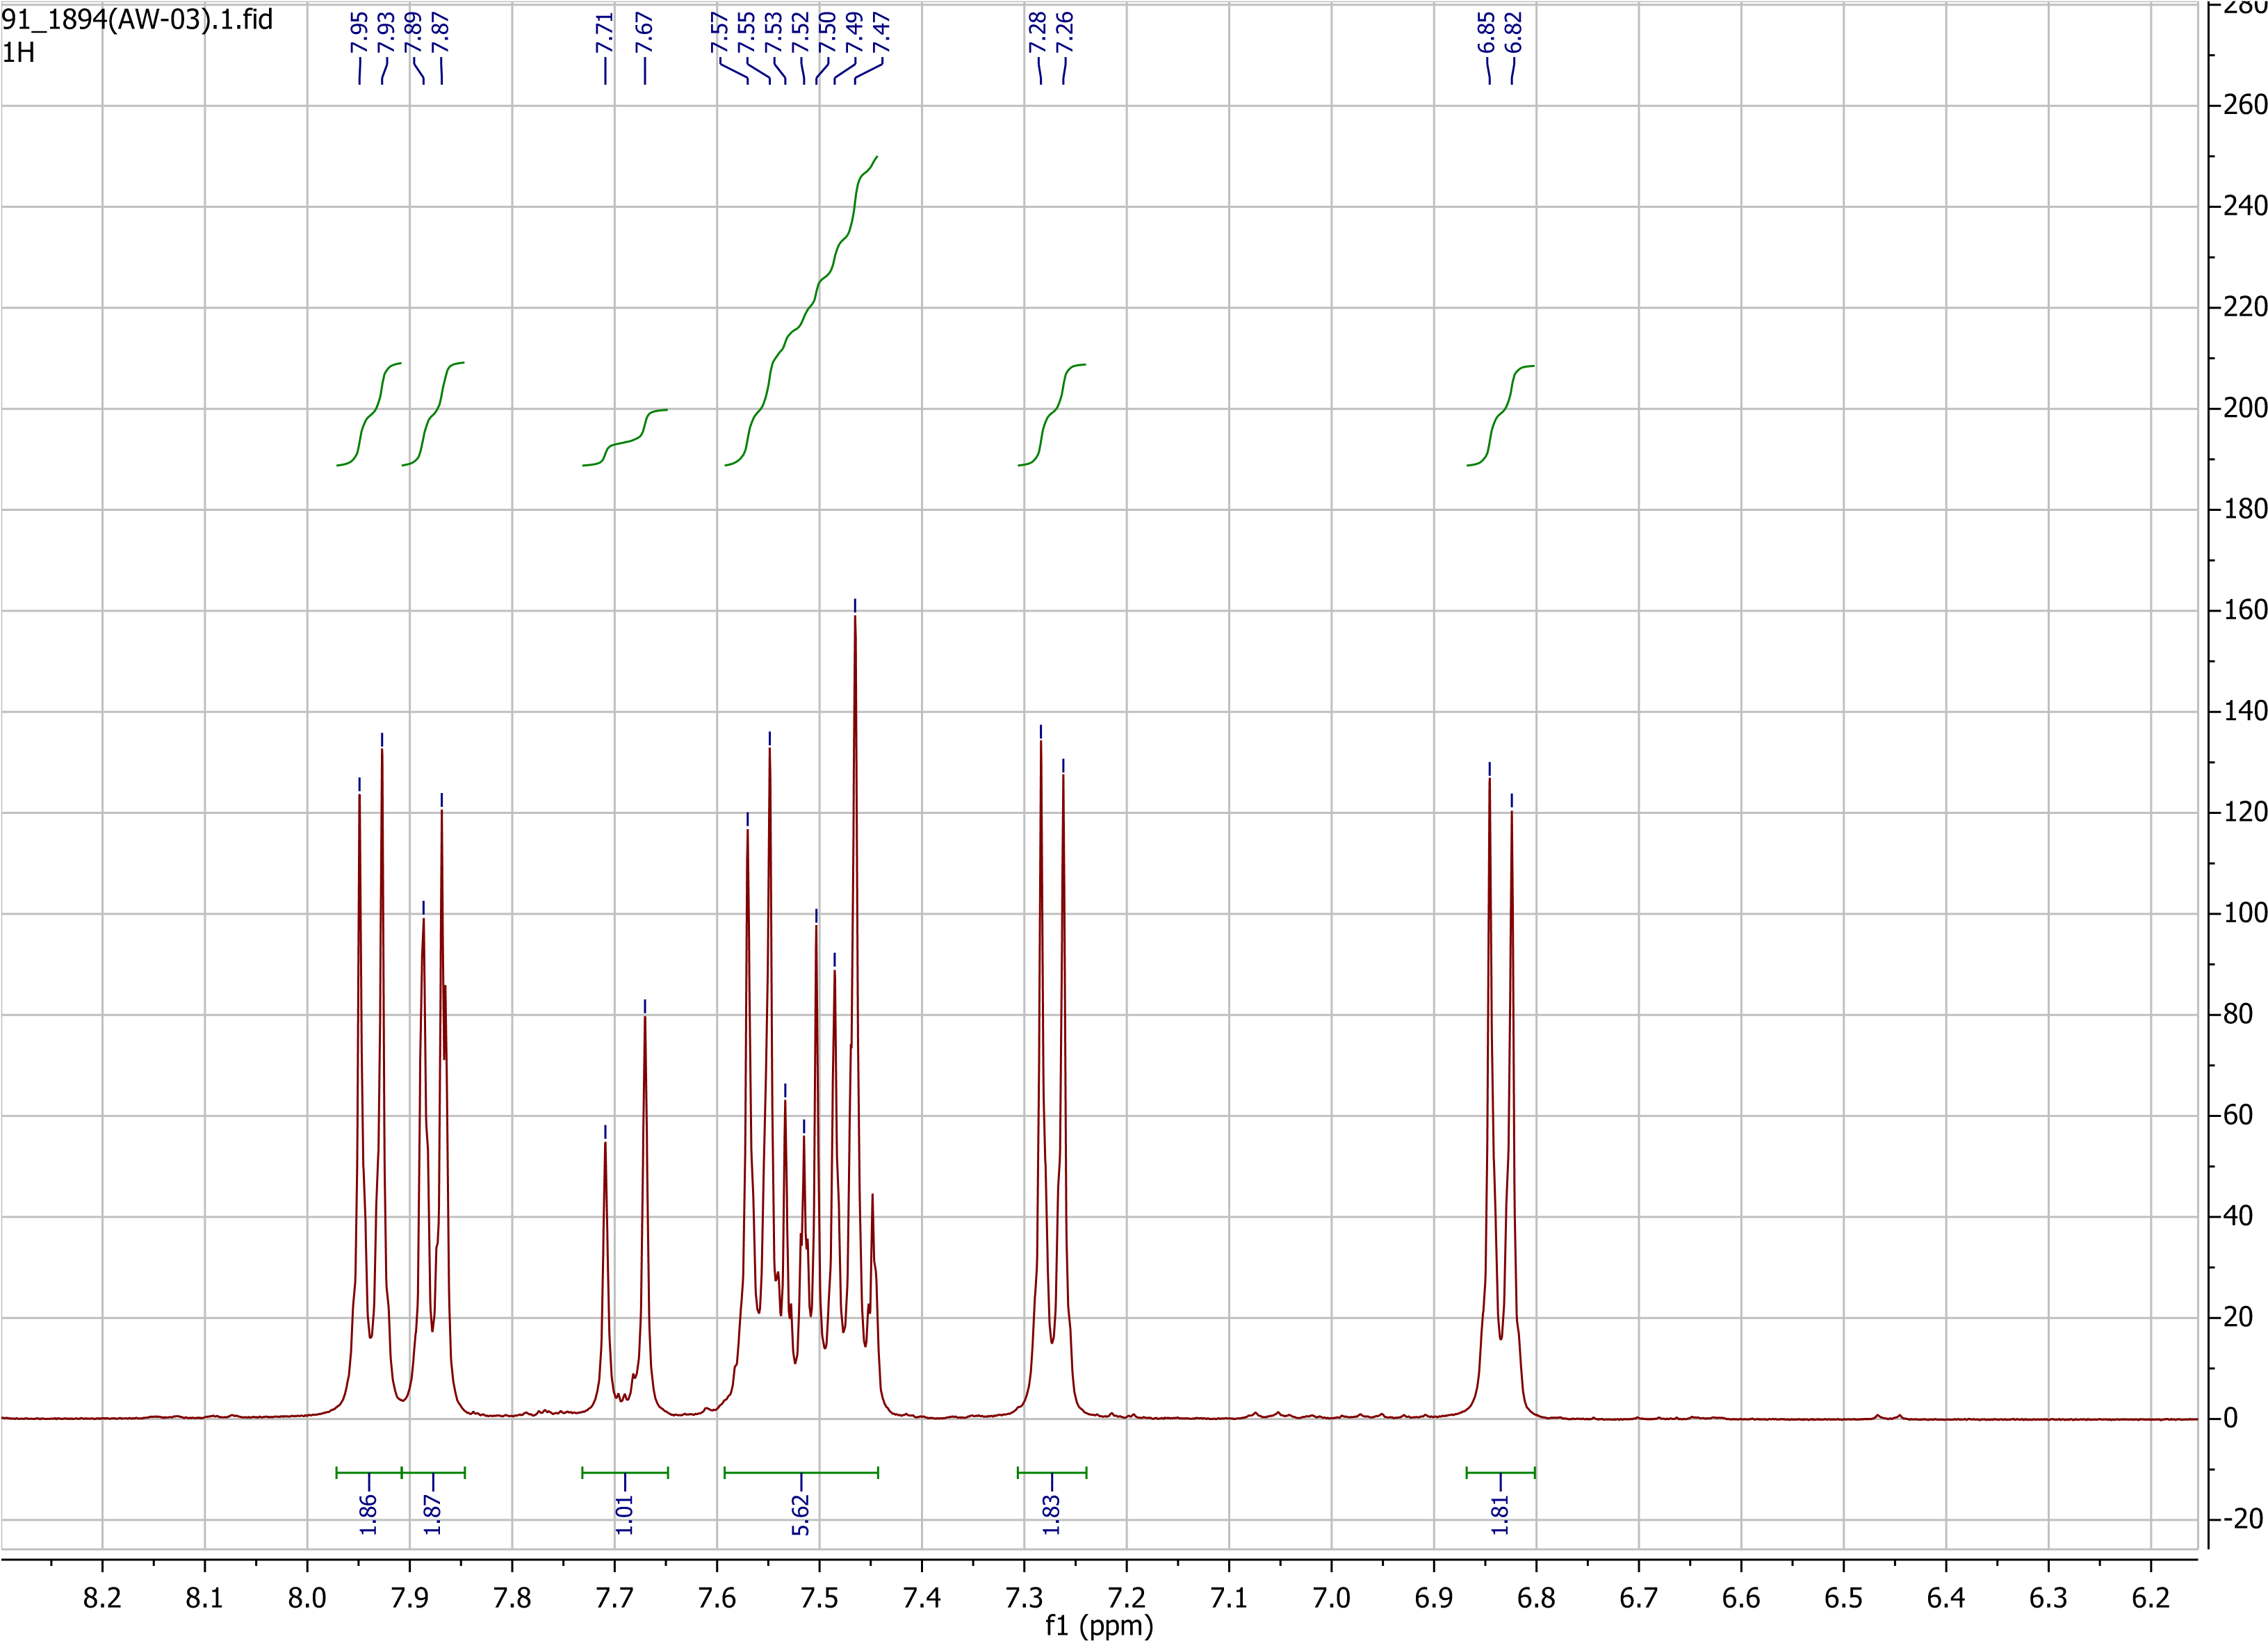


**Fig. S11:** 1H-NMR of compound **8.**


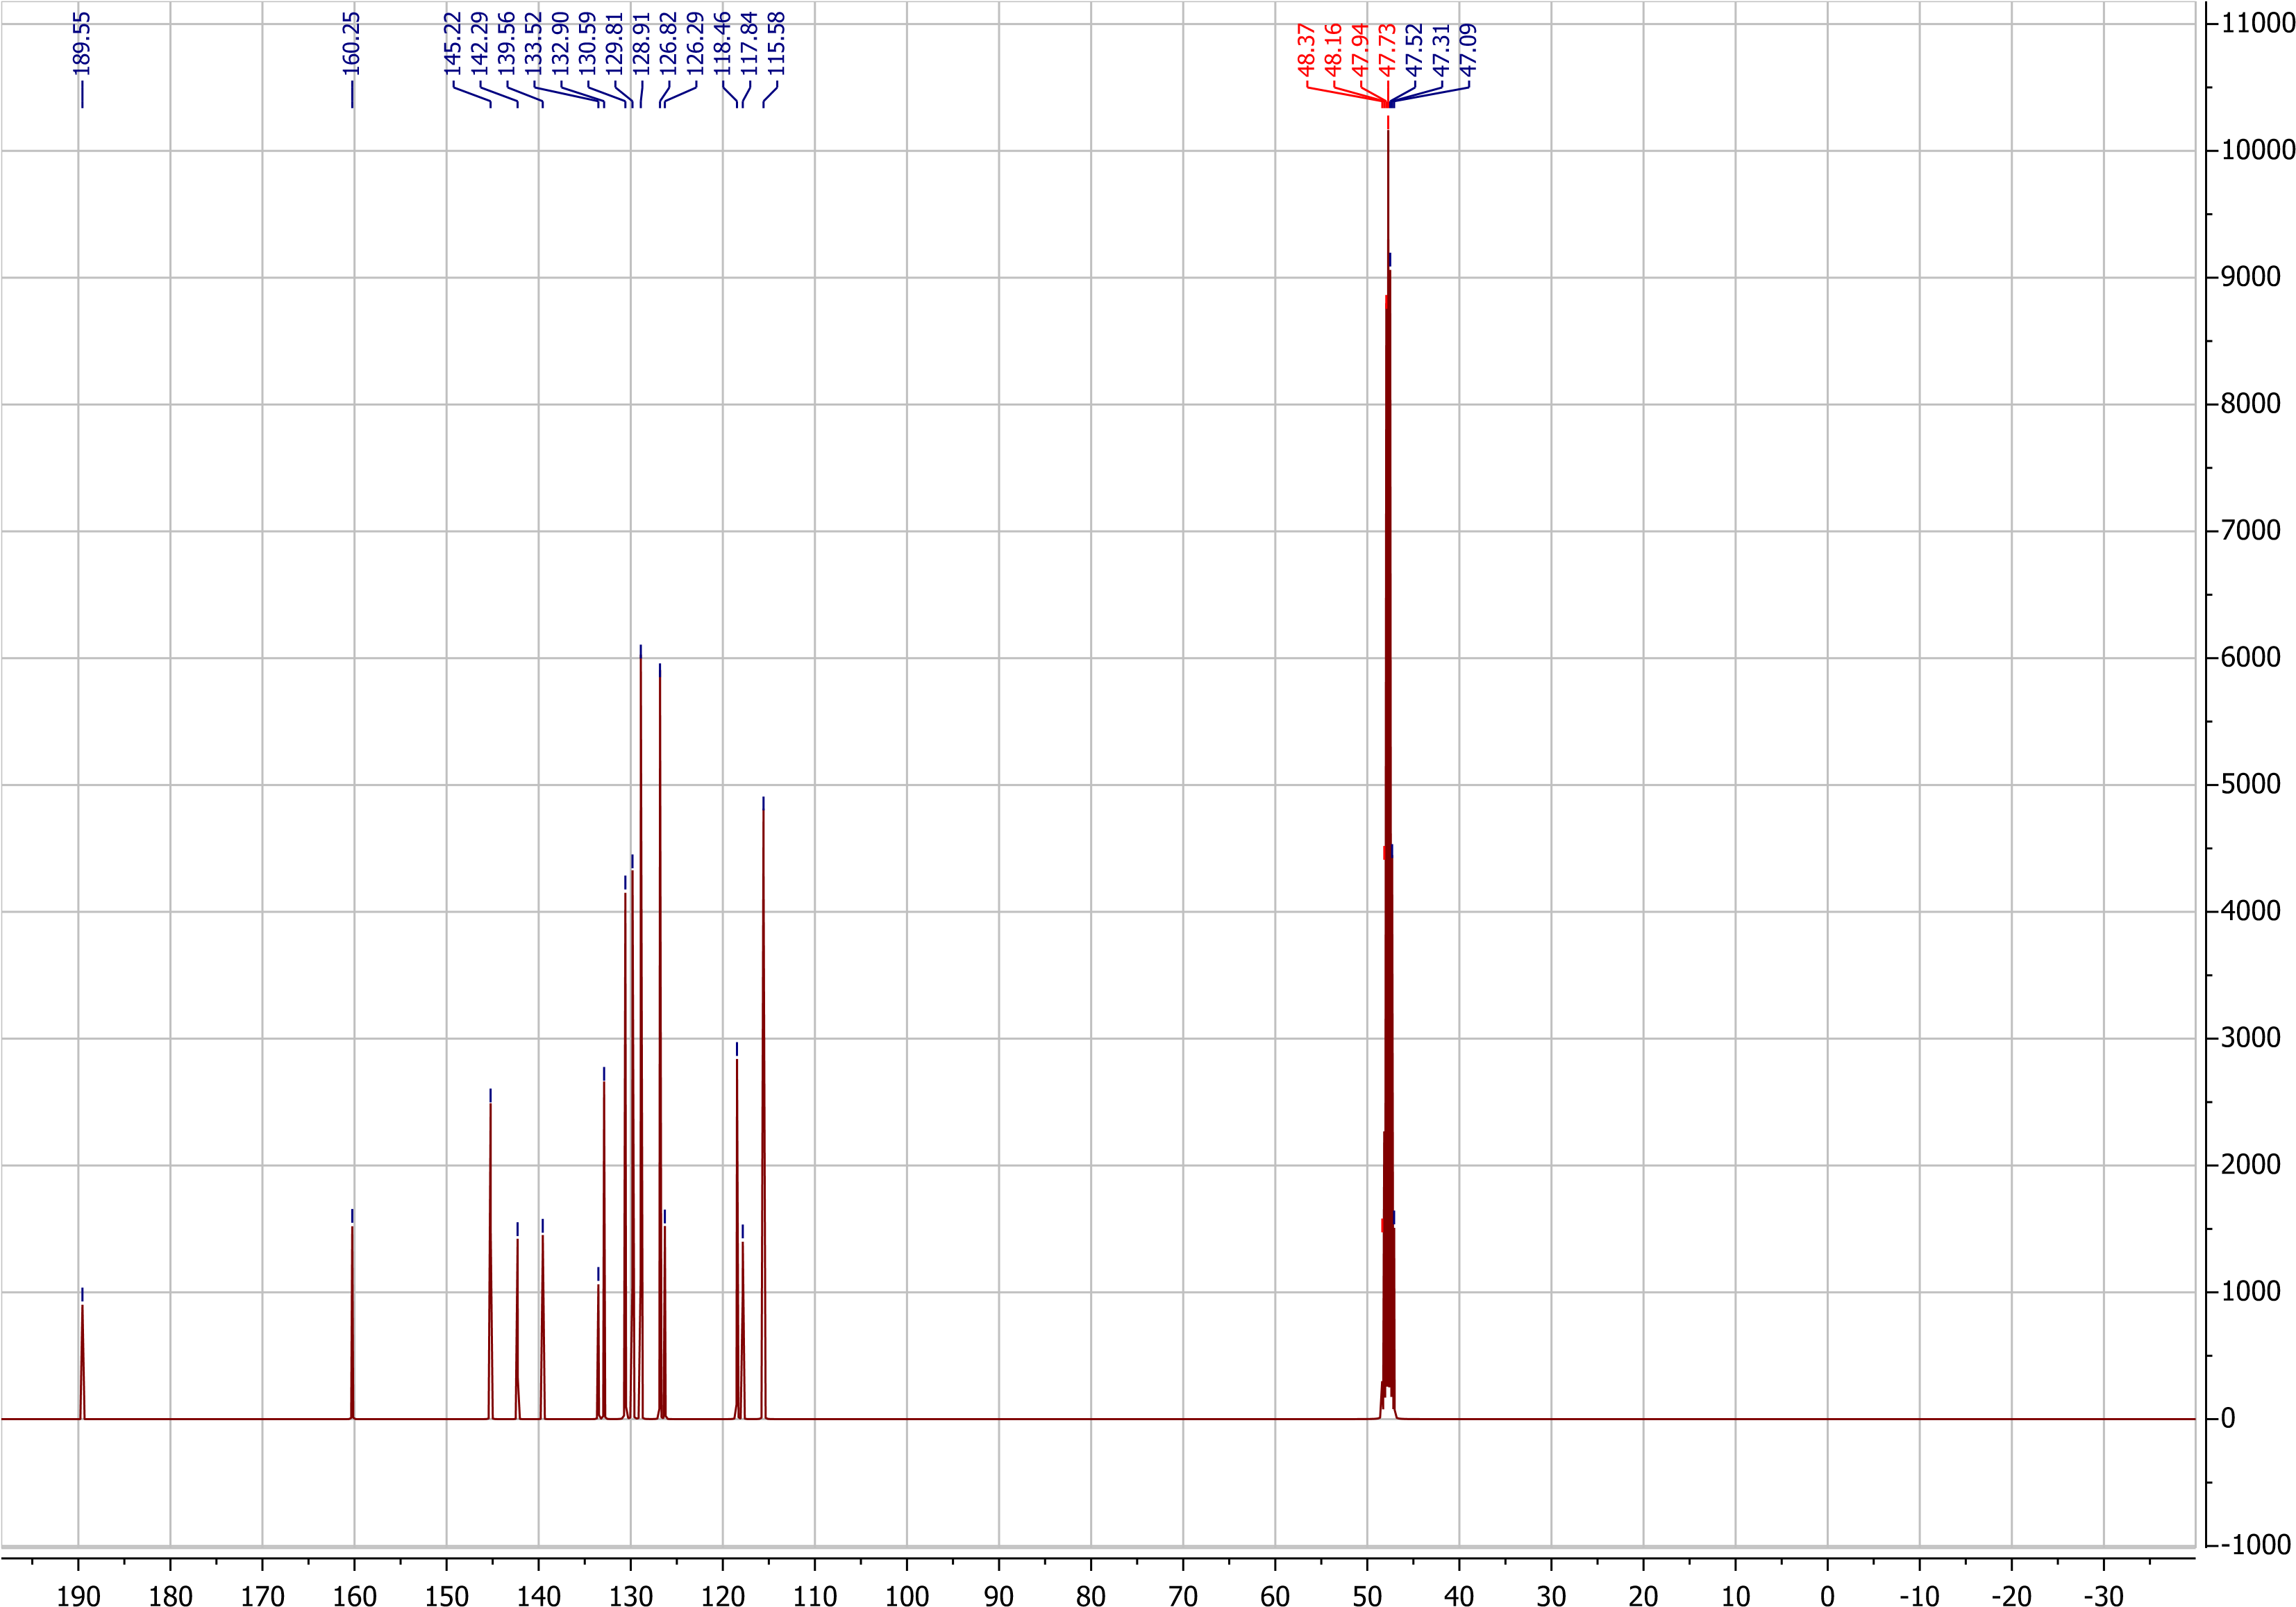


**Fig. S12:** 13C-NMR of compound **8.**


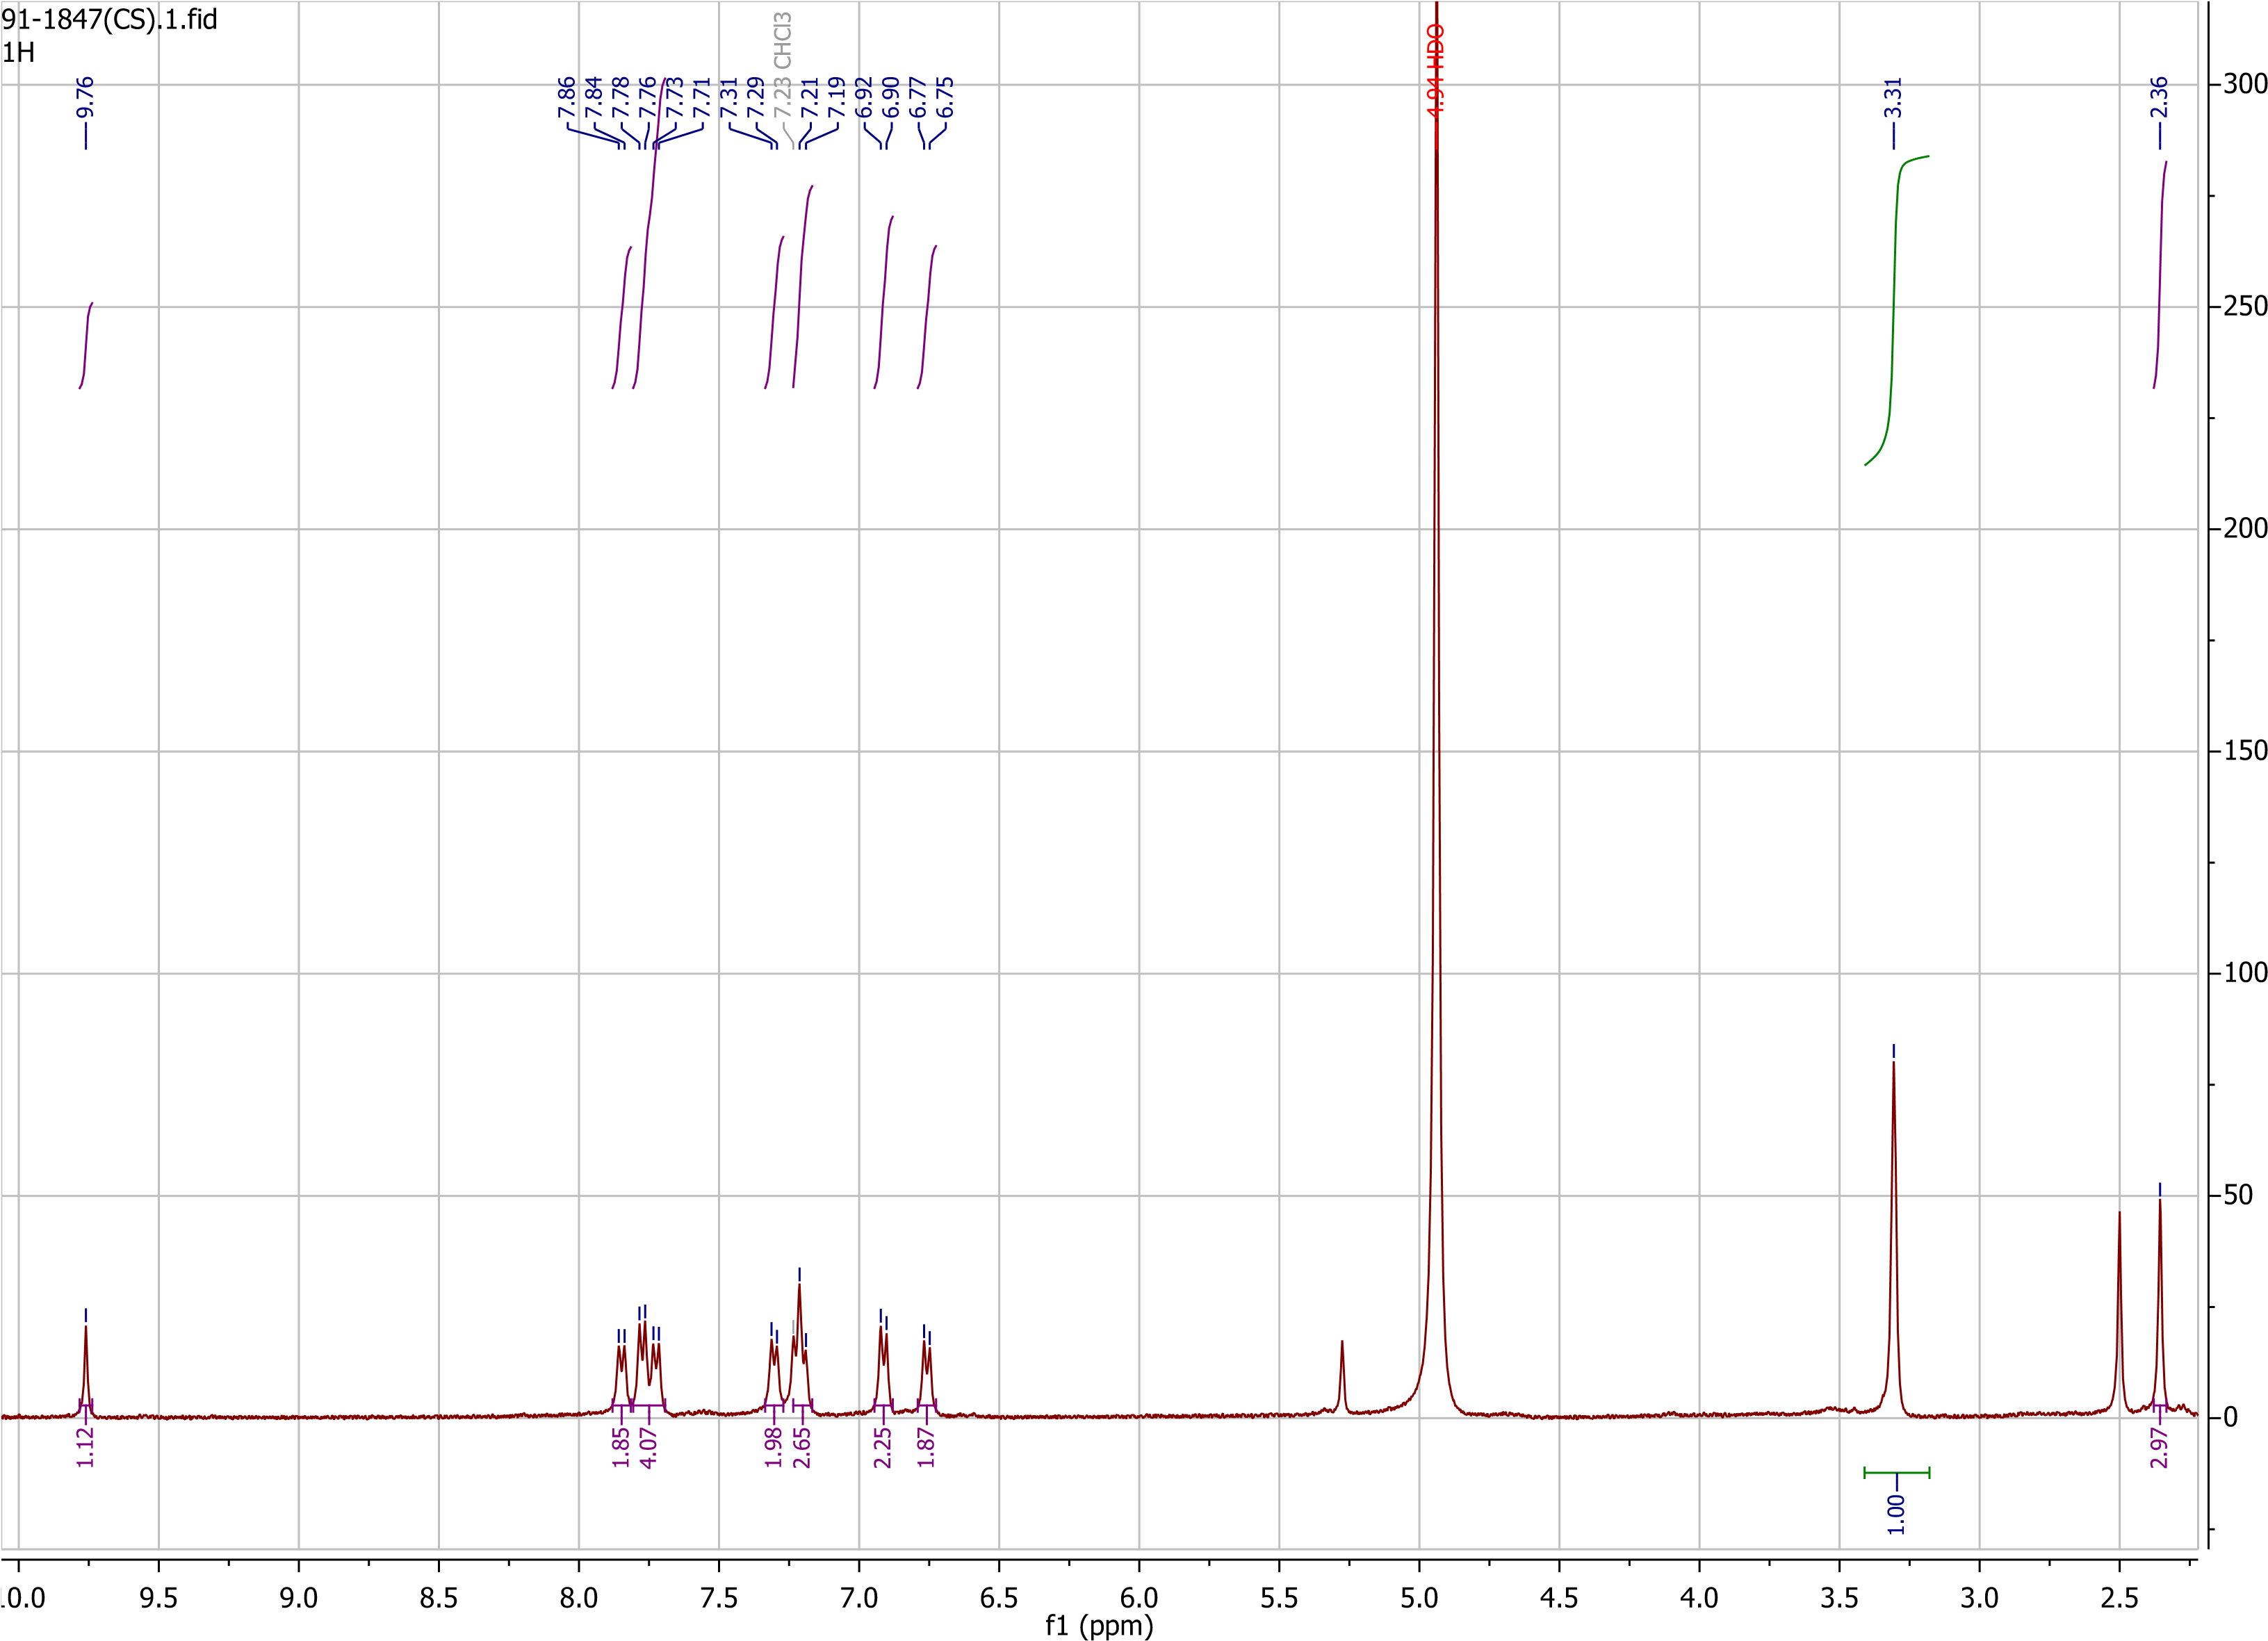


**Fig. S13:** 1H-NMR of compound **9.**


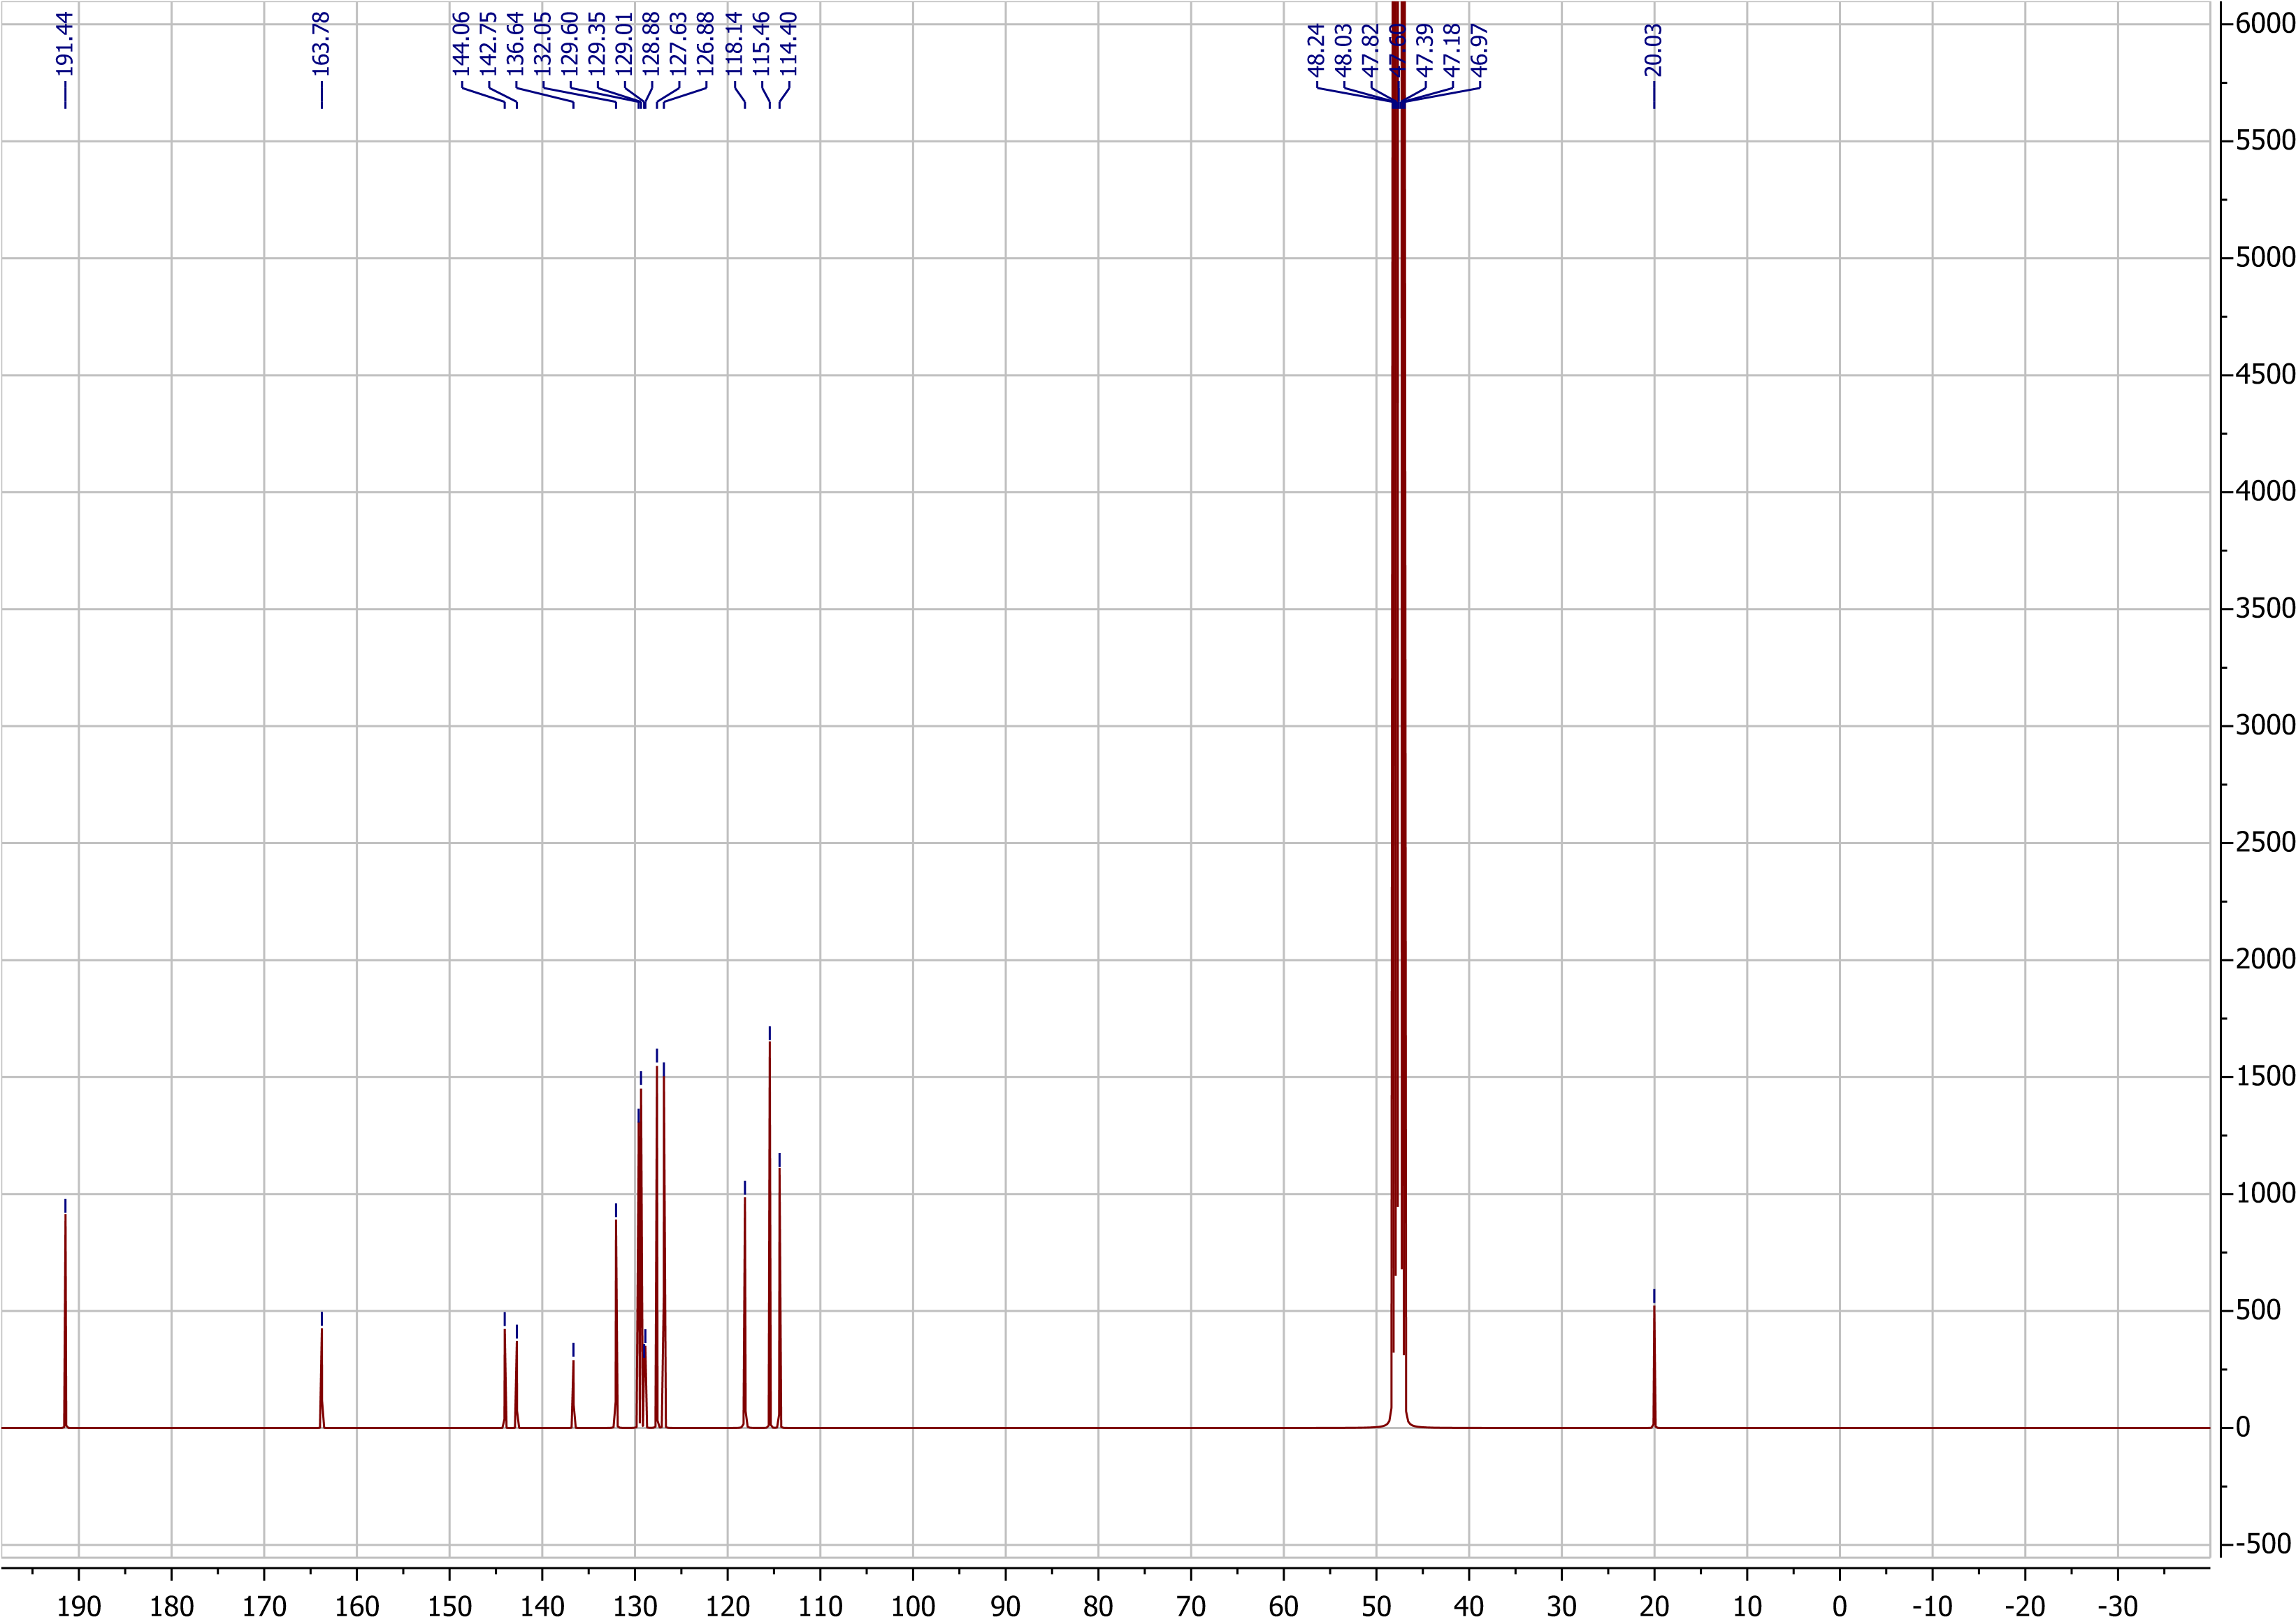


**Fig. S14:** 13C-NMR of compound **9.**


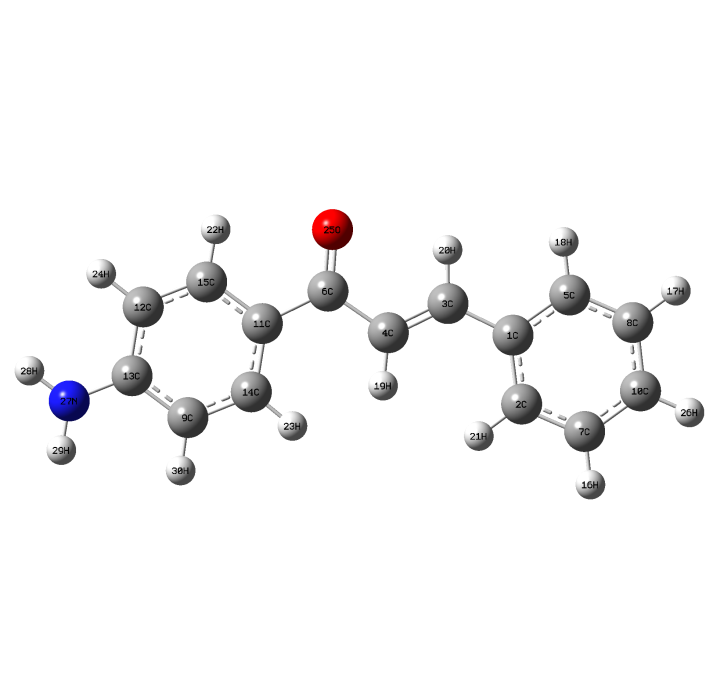

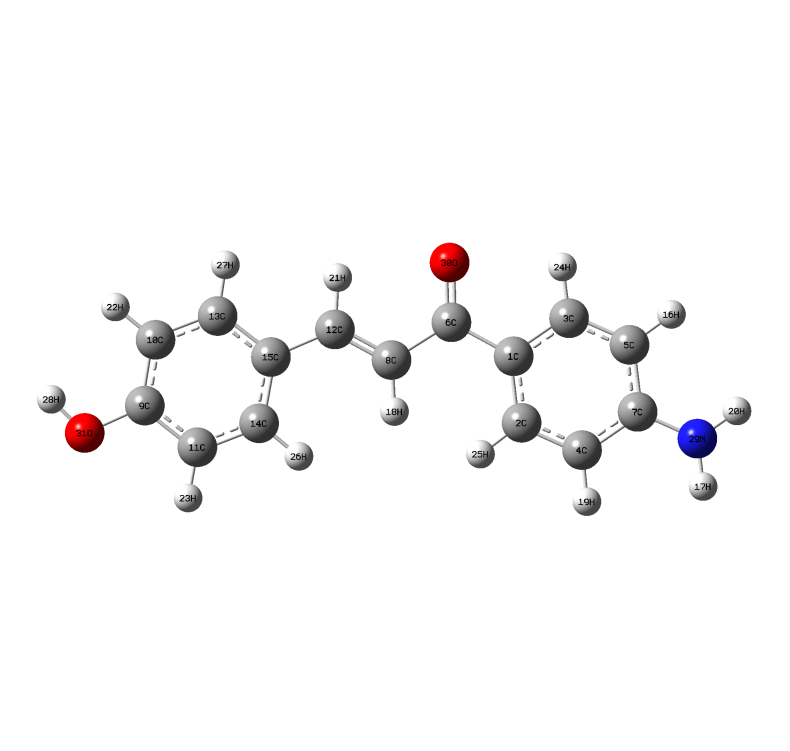


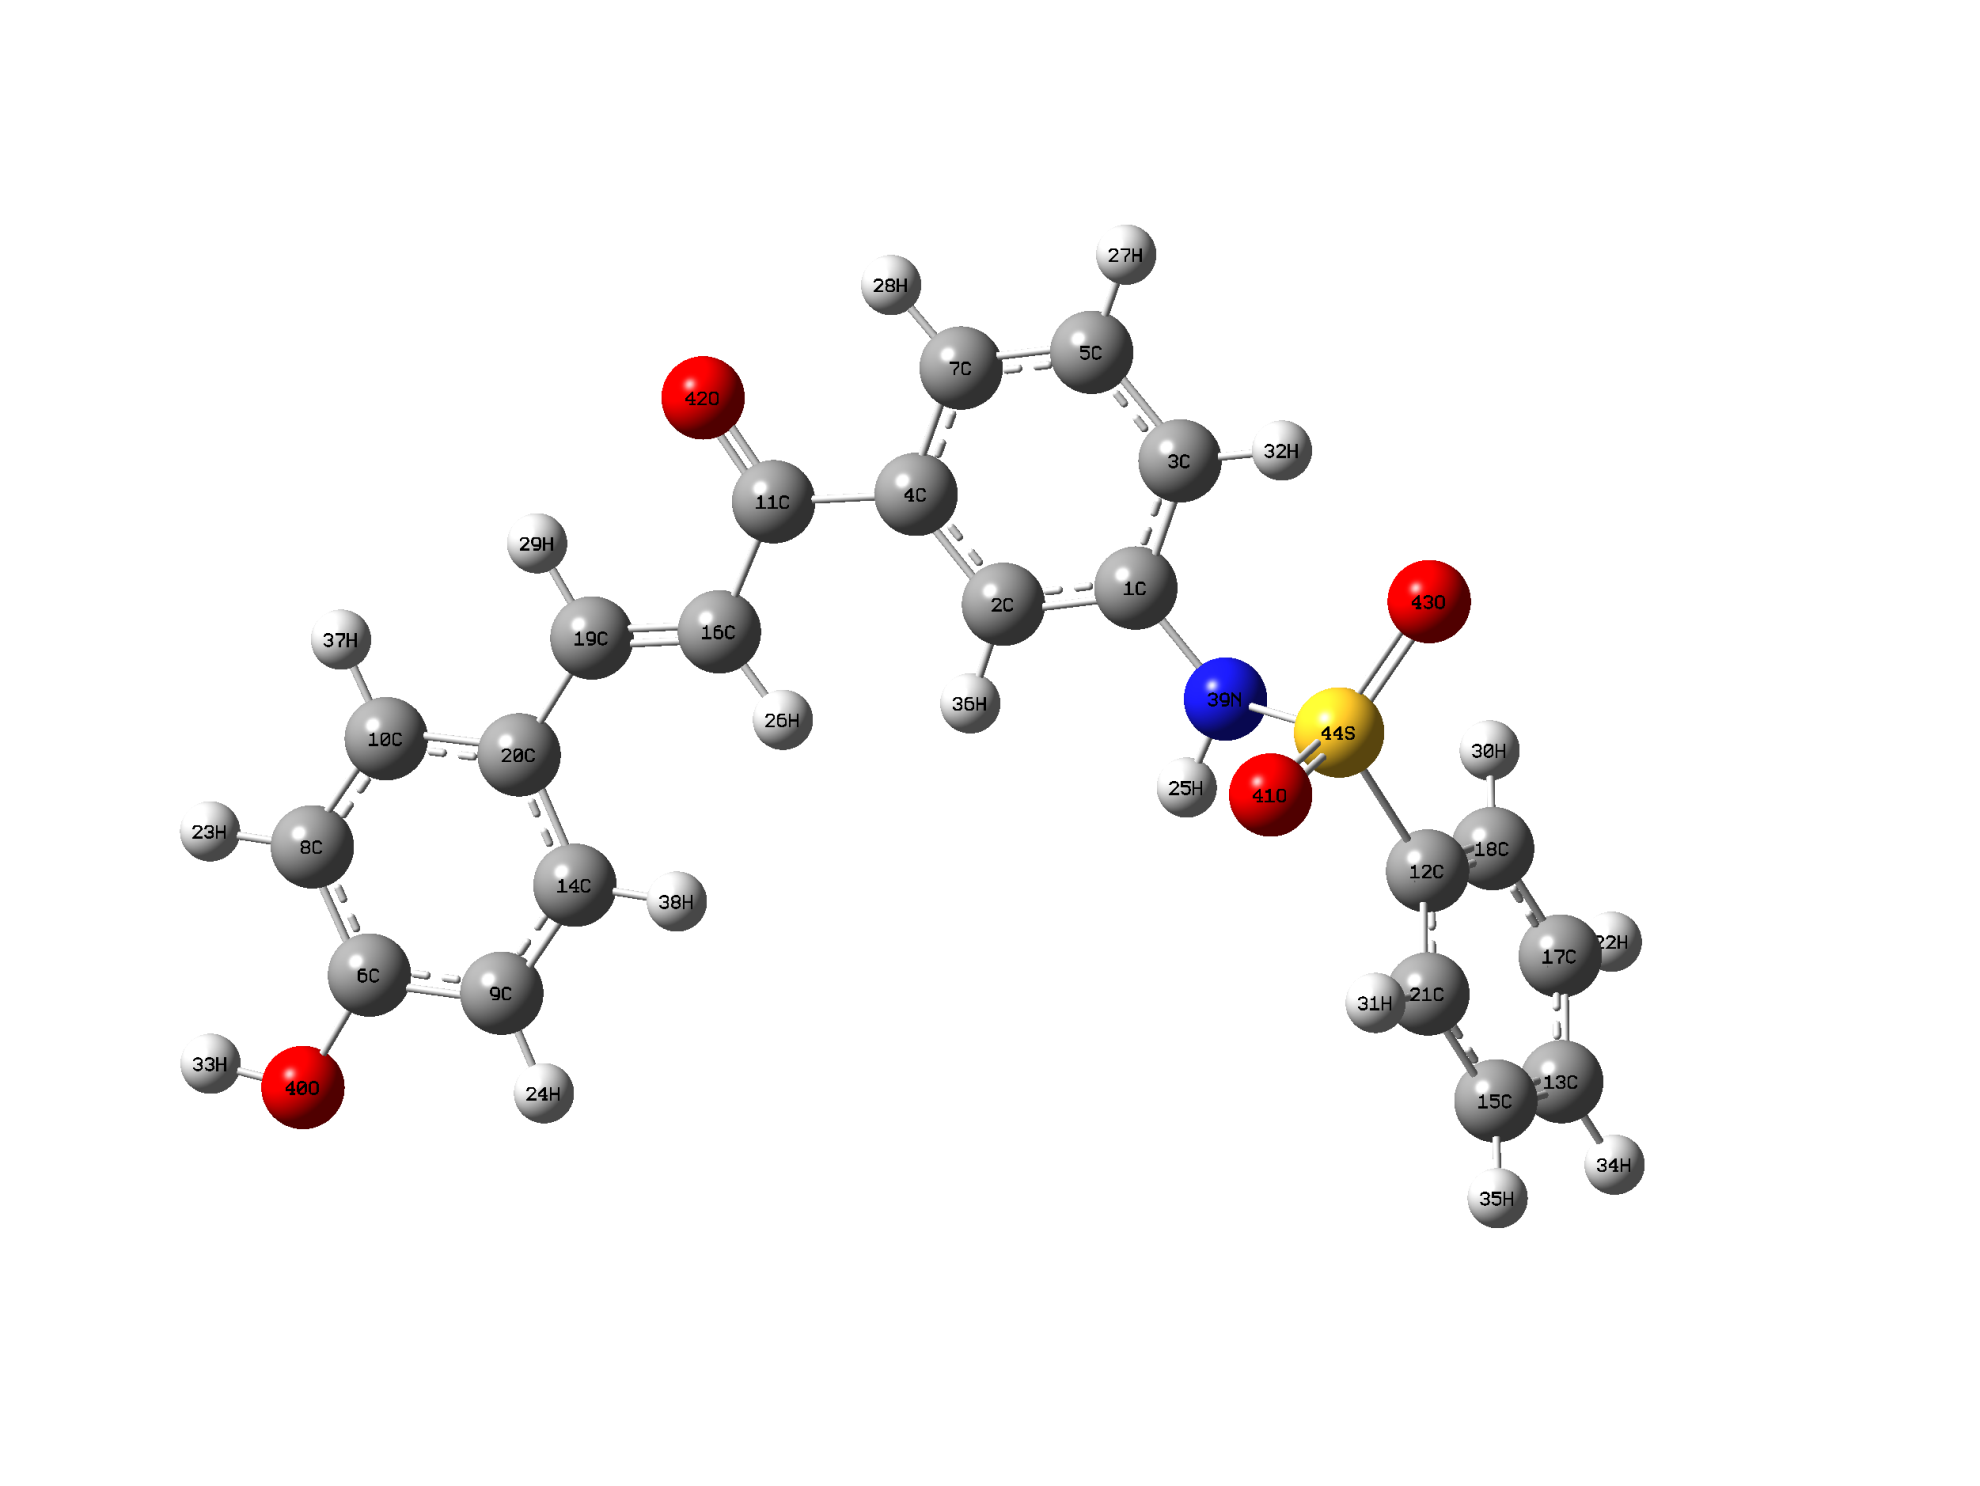

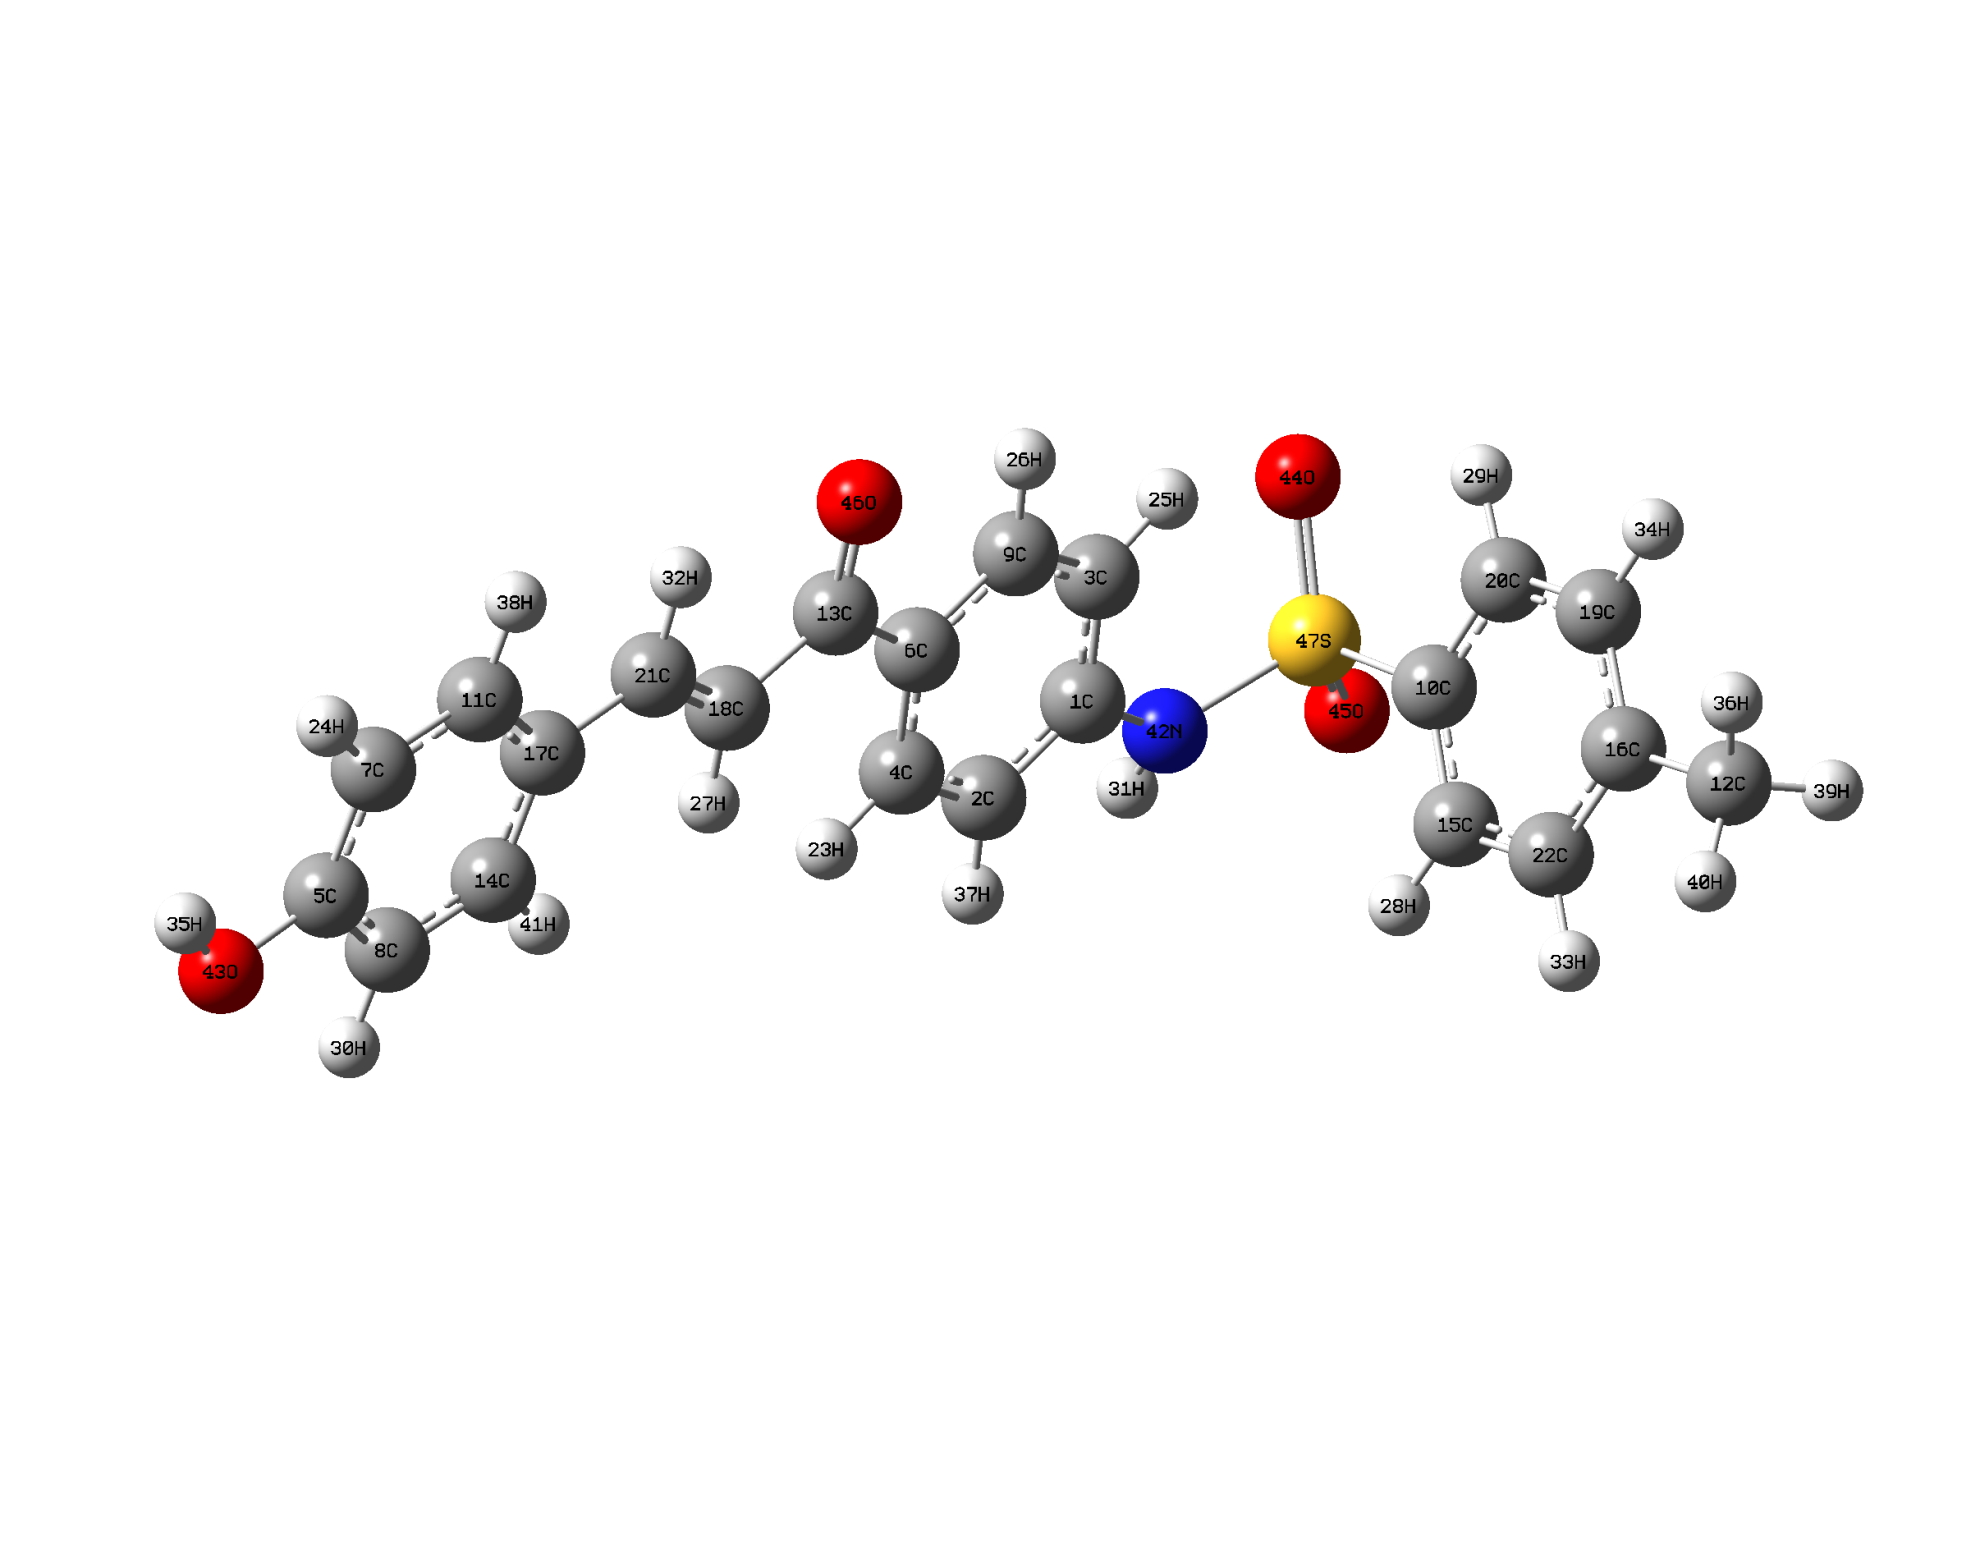


**Fig. S15**: The Optimized structures of compounds (**6-9**) [26].

Compound **6**


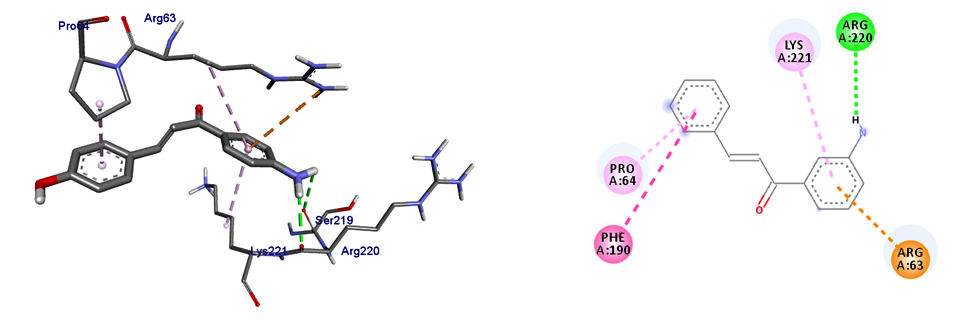


Compound **7**


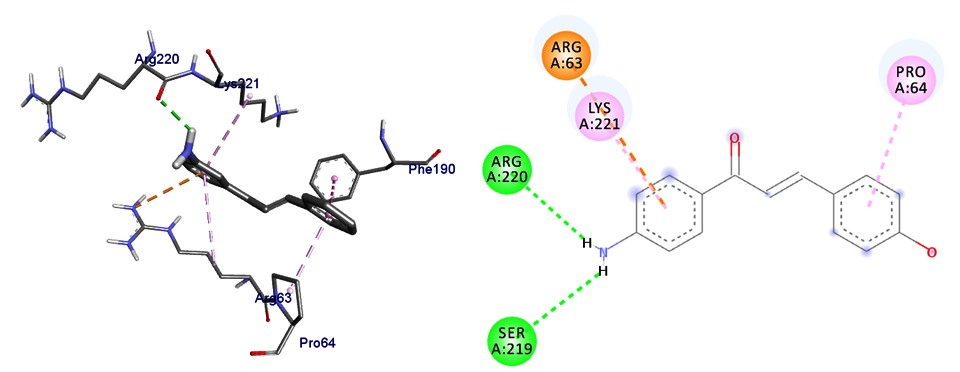


Compound **8**


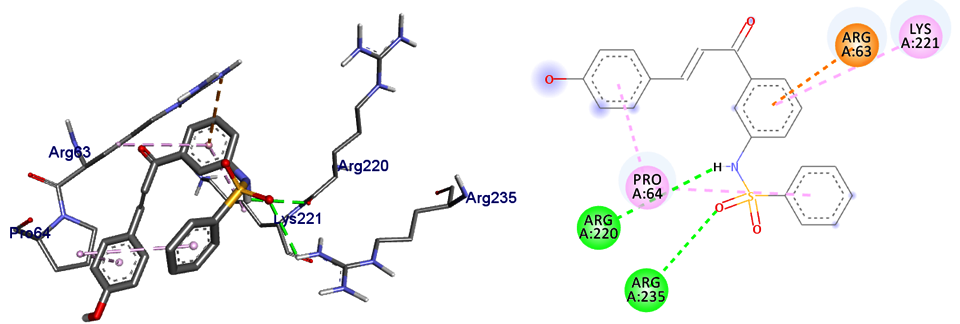


Compound **9**


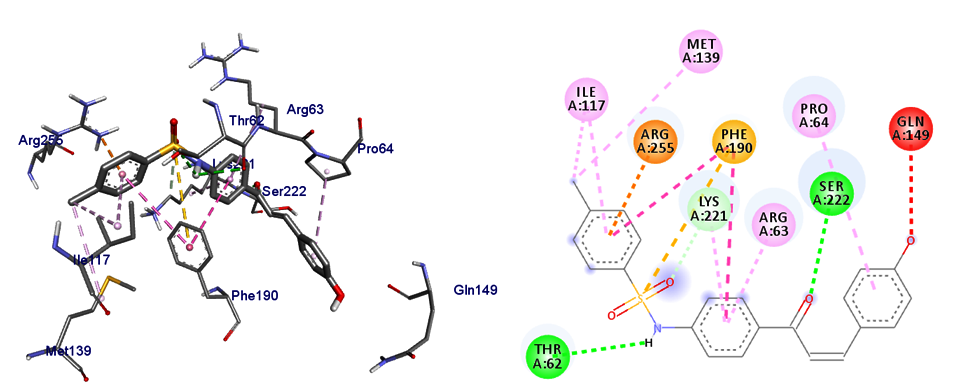


Sulfamethoxazole


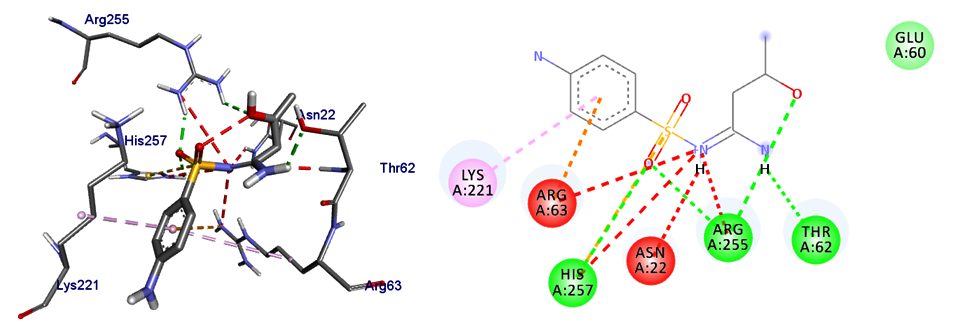


**Fig. S16**. The 2D and 3D binding interactions of compounds (**6-9**) against *E. Coli* dihydropteroate synthase (PDB ID: 1AJ0). Ribbon model shows the binding pocket structure of *E. Coli* dihydropteroate synthase with compounds **(6-9)**. Hydrogen bond between compounds and amino acids are shown as green dash lines, hydrophobic interaction are shown as pink lines [30].


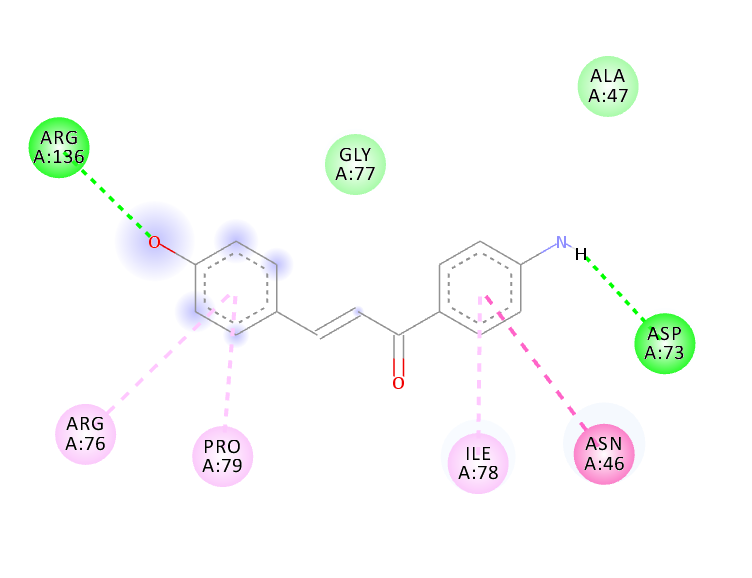


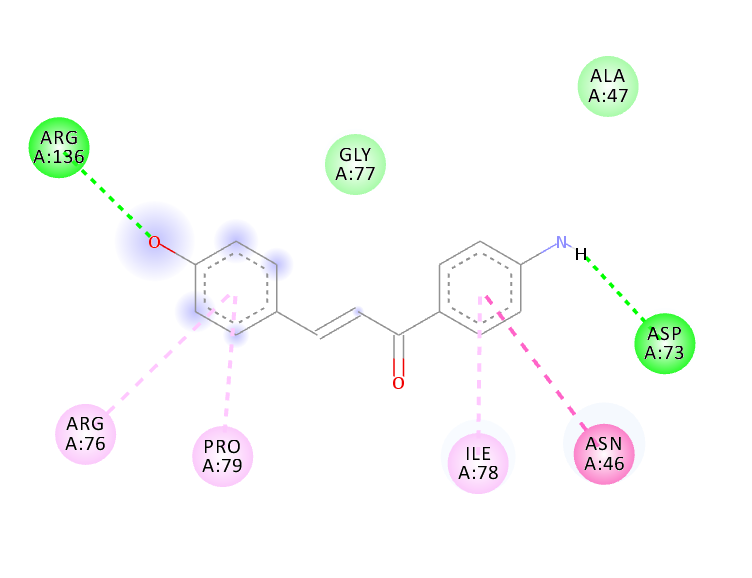

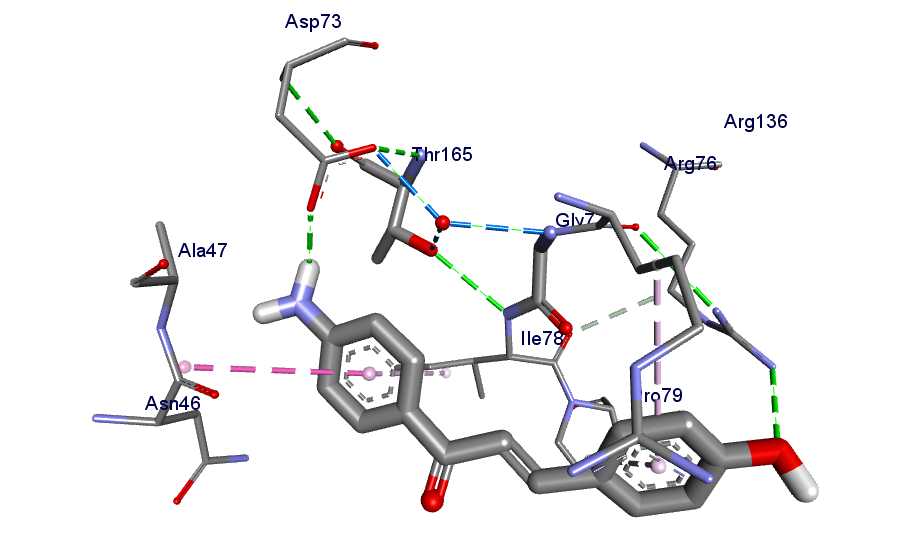


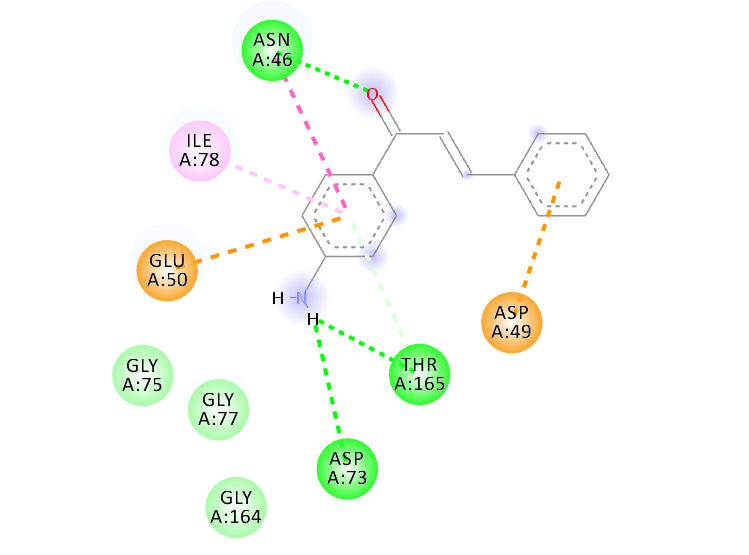

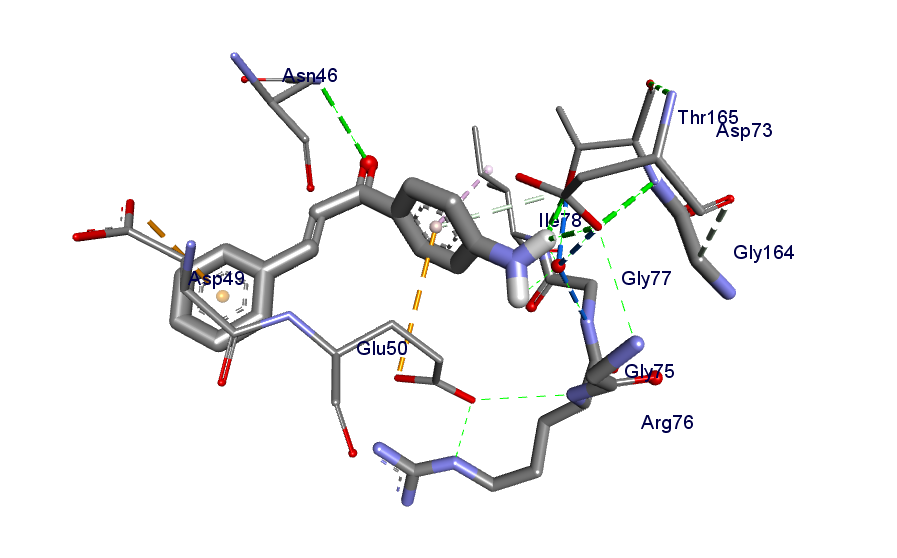


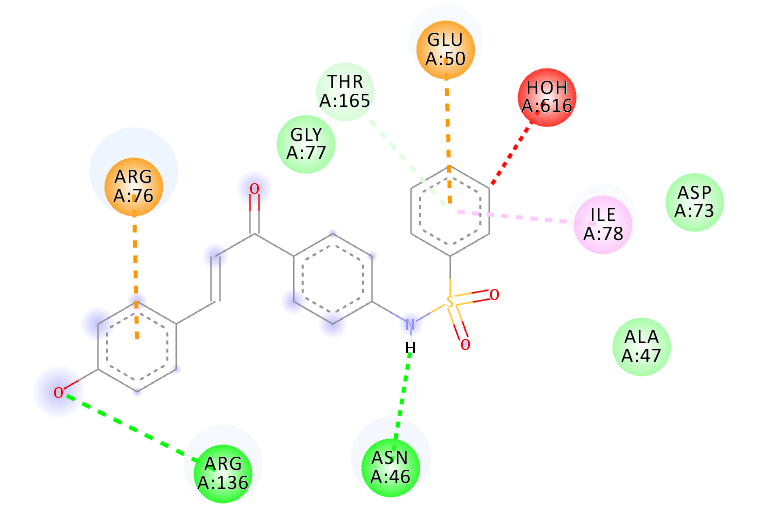

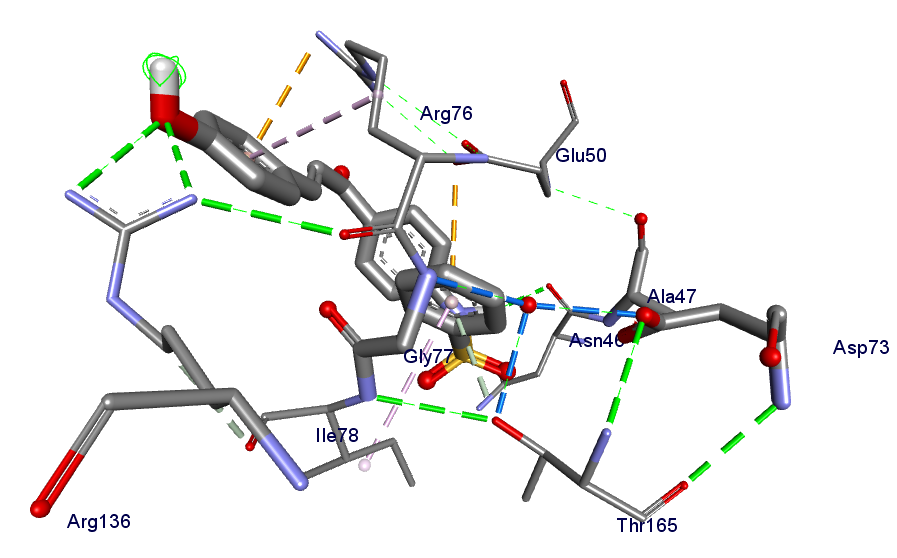


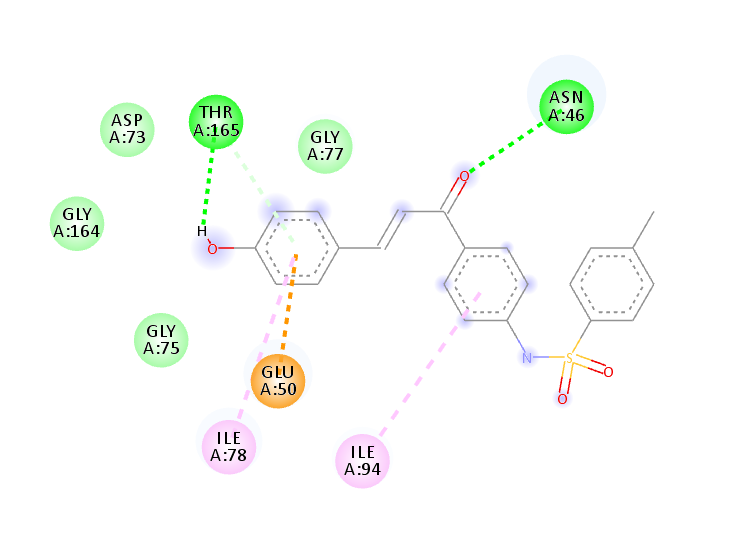

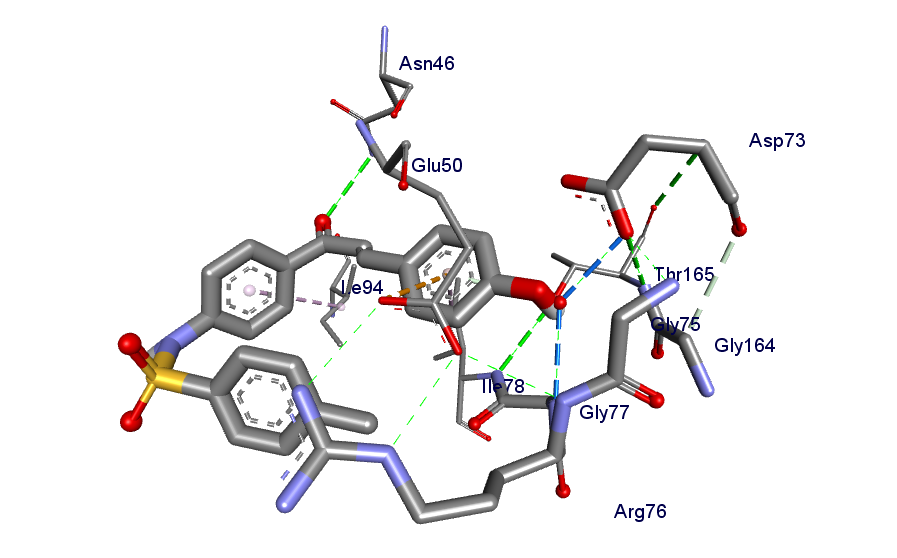


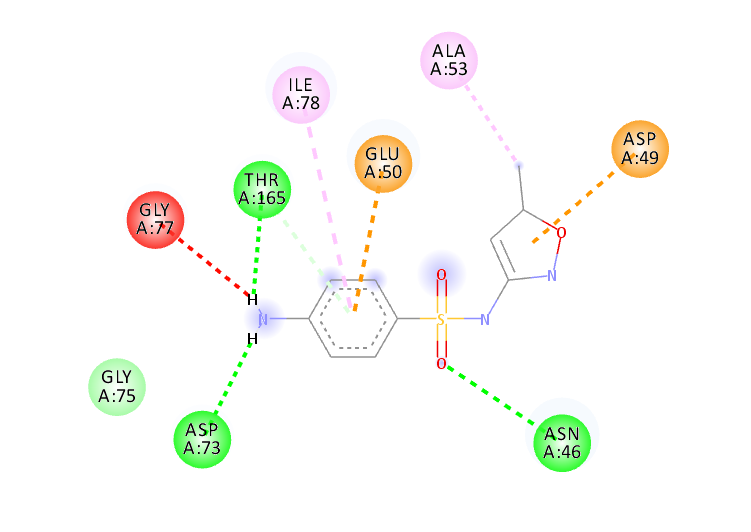

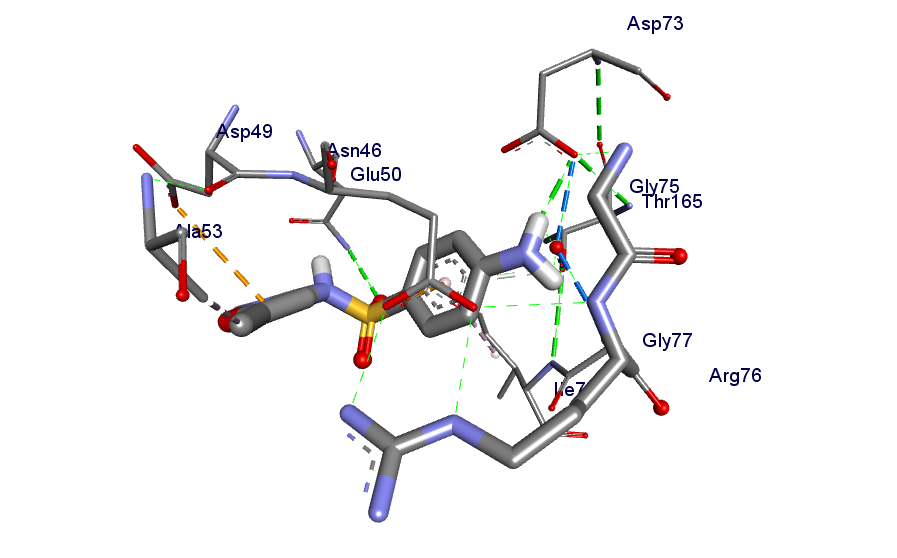


**Fig. S17**. The 2D and 3D binding interactions of Compound 6-9 against DNA gyrase B (PDB ID: 6F86). Ribbon model shows the binding pocket structure of DNA gyrase B with Compound 6-9. Hydrogen bond between compounds and amino acids are shown as green dash lines, hydrophobic interaction are shown as pink lines [30].

**Table S1** ADME predictions of isolated compounds, computed by SwissADME and PreADMET

| **S. No.** | **Compound** | **log Kp cm/s** | **GI Absorption** | **BBB Permeability** | **Inhibitor Interaction (SwissADME/PreADMET)** | | | | | |
| --- | --- | --- | --- | --- | --- | --- | --- | --- | --- | --- |
| **P-gp substrate** | **CYP1A2 inhibitor** | **CYP2C19 inhibitor** | **CYP2C9 inhibitor** | **CYP2D6 inhibitor** | **CYP3A4 inhibitor** |
| 1 | **6** | -5.9 | High | Yes | Yes | Yes | Yes | Yes | Yes | Yes |
| 2 | **7** | -5.61 | High | Yes | Yes | Yes | Yes | Yes | Yes | Yes |
| 3 | **8** | -6.47 | High | Yes | No | Yes | No | No | Yes | No |
| 4 | **9** | -6.05 | High | Yes | No | No | Yes | Yes | Yes | Yes |
| 5 | **Sulfamethoxazole** | -7.21 | High | No | No | No | No | No | No | No |

**Notes:** Data from these studies.23-25

LogKp = Skin permeation value, GI = Gastro-Intestinal, BBB = Blood Brain Barrier, P-gp = P-glycoprotein, CYP = Cytochrome-P

**Table S2** Predication of Toxicity of synthesized compound computed by Pre-ADMET and OSIRIS Property Explorer

| **S. No.** | **Compound** | **LD 50 (mg/kg)** | **Toxicity Class** | **Organ Toxicity** | | | | | |
| --- | --- | --- | --- | --- | --- | --- | --- | --- | --- |
| **Hepatotoxicity** | **Carcinogenicity** | **Cytotoxicity** | **Mutagenicity** | **Reproductive Effective** | **Irritant** |
| 1 | **6** | 1048 | 4 | Yes | No | No | No | No | No |
| 2 | **7** | 3000 | 5 | Yes | Yes | No | No | No | No |
| 3 | **8** | 6000 | 6 | Yes | Yes | No | No | No | No |
| 4 | **9** | 6000 | 6 | Yes | Yes | No | No | No | No |
| 5 | **Sulfamethoxazole** | 2300 | 5 | Yes | No | No | No | No | No |

**Table S3** The various quantum chemical parameters of compounds (6-9)

| **S.NO** | **Compounds** | **EHUMO (eV)** | **ELUMO (eV)** | **Energy Gap**  **ΔE (eV)** | **Electronegativity**  **χ (eV)** | **Global Hardness**  **η (eV)** | **Global Softness**  **σ (eV-1)** | **Global Electrophilicity**  **ω (eV)** |
| --- | --- | --- | --- | --- | --- | --- | --- | --- |
| **1** | **6** | -5.39872 | -1.55104 | 3.847678 | 3.474883 | 1.923839 | 0.519794 | 3.138208 |
| **2** | **7** | -5.48308 | -1.70343 | 3.77965 | 3.593252 | 1.889825 | 0.52915 | 3.416047 |
| **3** | **8** | -5.98104 | -2.01364 | 3.967408 | 3.99734 | 1.983704 | 0.504108 | 4.027498 |
| **4** | **9** | -5.87492 | -1.86942 | 4.005503 | 3.872168 | 2.002752 | 0.499313 | 3.743271 |

**Note:** Data from Abu-Melha S.28

**Table S4** The values of the Mullikan's atomic charges of the compounds

Ligand **6** Ligand **7** Ligand **8** Ligand **9**

| 1 | C | -0.07646 | 1 | C | -0.0211 | 1 | C | 0.278505 | 1 | C | 0.326313 |
| --- | --- | --- | --- | --- | --- | --- | --- | --- | --- | --- | --- |
| 2 | C | -0.20137 | 2 | C | -0.18749 | 2 | C | -0.20657 | 2 | C | -0.18033 |
| 3 | C | -0.15779 | 3 | C | -0.12251 | 3 | C | -0.18716 | 3 | C | -0.21192 |
| 4 | C | -0.19109 | 4 | C | -0.2569 | 4 | C | -0.06451 | 4 | C | -0.20164 |
| 5 | C | -0.19505 | 5 | C | -0.18123 | 5 | C | -0.18827 | 5 | C | 0.295038 |
| 6 | C | 0.391204 | 6 | C | 0.391785 | 6 | C | 0.296431 | 6 | C | -0.0679 |
| 7 | C | 0.351142 | 7 | C | -0.18083 | 7 | C | -0.16046 | 7 | C | -0.2151 |
| 8 | C | -0.2615 | 8 | C | -0.184 | 8 | C | -0.21464 | 8 | C | -0.17806 |
| 9 | C | 0.292569 | 9 | C | -0.19069 | 9 | C | -0.17766 | 9 | C | -0.16014 |
| 10 | C | -0.2156 | 10 | C | -0.18207 | 10 | C | -0.17887 | 10 | C | -0.45799 |
| 11 | C | -0.17885 | 11 | C | -0.07658 | 11 | C | 0.402253 | 11 | C | -0.17957 |
| 12 | C | -0.12249 | 12 | C | -0.19457 | 12 | C | -0.47758 | 12 | C | -0.59978 |
| 13 | C | -0.18075 | 13 | C | 0.352016 | 13 | C | -0.1755 | 13 | C | 0.396733 |
| 14 | C | -0.18794 | 14 | C | -0.20104 | 14 | C | -0.1861 | 14 | C | -0.18719 |
| 15 | C | -0.02767 | 15 | C | -0.15707 | 15 | C | -0.17704 | 15 | C | -0.14922 |
| 16 | H | 0.172563 | 16 | H | 0.189285 | 16 | C | -0.26303 | 16 | C | 0.020513 |
| 17 | H | 0.310663 | 17 | H | 0.190721 | 17 | C | -0.17638 | 17 | C | -0.02854 |
| 18 | H | 0.182152 | 18 | H | 0.193147 | 18 | C | -0.15472 | 18 | C | -0.26281 |
| 19 | H | 0.170223 | 19 | H | 0.185721 | 19 | C | -0.11667 | 19 | C | -0.17585 |
| 20 | H | 0.311732 | 20 | H | 0.216786 | 20 | C | -0.02849 | 20 | C | -0.15166 |
| 21 | H | 0.214088 | 21 | H | 0.186422 | 21 | C | -0.1561 | 21 | C | -0.11881 |
| 22 | H | 0.180394 | 22 | H | 0.214252 | 22 | H | 0.209332 | 22 | C | -0.17411 |
| 23 | H | 0.205732 | 23 | H | 0.186784 | 23 | H | 0.184261 | 23 | H | 0.191899 |
| 24 | H | 0.213299 | 24 | H | 0.173766 | 24 | H | 0.208524 | 24 | H | 0.18282 |
| 25 | H | 0.186328 | 25 | O | -0.50071 | 25 | H | 0.327126 | 25 | H | 0.224554 |
| 26 | H | 0.190902 | 26 | H | 0.190216 | 26 | H | 0.184112 | 26 | H | 0.22075 |
| 27 | H | 0.196535 | 27 | N | -0.82923 | 27 | H | 0.198412 | 27 | H | 0.184023 |
| 28 | H | 0.357845 | 28 | H | 0.31254 | 28 | H | 0.215929 | 28 | H | 0.220739 |
| 29 | N | -0.82955 | 29 | H | 0.311407 | 29 | H | 0.218374 | 29 | H | 0.24292 |
| 30 | O | -0.50426 | 30 | H | 0.171174 | 30 | H | 0.239045 | 30 | H | 0.208054 |
| 31 | O | -0.59701 |  |  |  | 31 | H | 0.247341 | 31 | H | 0.346841 |
|  |  |  |  |  |  | 32 | H | 0.240474 | 32 | H | 0.216599 |
|  |  |  |  |  |  | 33 | H | 0.360375 | 33 | H | 0.198716 |
|  |  |  |  |  |  | 34 | H | 0.207168 | 34 | H | 0.200695 |
|  |  |  |  |  |  | 35 | H | 0.208911 | 35 | H | 0.359464 |
|  |  |  |  |  |  | 36 | H | 0.179634 | 36 | H | 0.21248 |
|  |  |  |  |  |  | 37 | H | 0.199713 | 37 | H | 0.18296 |
|  |  |  |  |  |  | 38 | H | 0.190516 | 38 | H | 0.198316 |
|  |  |  |  |  |  | 39 | N | -0.8736 | 39 | H | 0.224211 |
|  |  |  |  |  |  | 40 | O | -0.59529 | 40 | H | 0.208821 |
|  |  |  |  |  |  | 41 | O | -0.54445 | 41 | H | 0.191701 |
|  |  |  |  |  |  | 42 | O | -0.48847 | 42 | N | -0.94112 |
|  |  |  |  |  |  | 43 | O | -0.5381 | 43 | O | -0.59574 |
|  |  |  |  |  |  | 44 | S | 1.533205 | 44 | O | -0.55851 |
|  |  |  |  |  |  |  |  |  | 45 | O | -0.55609 |
|  |  |  |  |  |  |  |  |  | 46 | O | -0.49526 |
|  |  |  |  |  |  |  |  |  | 47 | S | 1.59217 |

**Note:** Data from Abu-Melha S.28
